1 **mTOR-neuropeptide Y signaling sensitizes nociceptors to drive**  
2 **neuropathic pain**

3 Lunhao Chen<sup>1†</sup>, Yaling Hu<sup>2,3,4†</sup>, Siyuan Wang<sup>1†</sup>, Kelei Cao<sup>2,3,4</sup>, Weihao Mai<sup>2,3</sup>, Weilin  
4 Sha<sup>5</sup>, Huan Ma<sup>2,3,4</sup>, Yong-Jing Gao<sup>5</sup>, Shumin Duan<sup>2,3,4</sup>, Yue Wang<sup>1\*</sup>, Zhihua Gao<sup>2,3,4\*</sup>

5 <sup>1</sup> Spine Lab, Department of Orthopedic Surgery, The First Affiliated Hospital, Zhejiang  
6 University School of Medicine, Hangzhou 310003, China

7 <sup>2</sup> Department of Neurobiology and Department of Neurology of Second Affiliated  
8 Hospital, NHC and CAMS Key Laboratory of Medical Neurobiology, Zhejiang  
9 University School of Medicine, Hangzhou 310058, China

10 <sup>3</sup> The MOE Frontier Research Center of Brain & Brain-machine Integration, Zhejiang  
11 University School of Brain Science and Brain Medicine, Hangzhou 310058, China

12 <sup>4</sup> Liangzhu Laboratory, Zhejiang University Medical Center, 1369 West Wenyi Road,  
13 Hangzhou 311121, China

14 <sup>5</sup> Institute of Pain Medicine and Special Environmental Medicine, Nantong University,  
15 Nantong 226019, China

16 † These authors contributed equally to this work.

17 \* Correspondence: [zhihuagao@zju.edu.cn](mailto:zhihuagao@zju.edu.cn) (Z.G.) and [wangyuespine@zju.edu.cn](mailto:wangyuespine@zju.edu.cn) (Y.  
18 W.).

19

20 **Abstract**

21 Neuropathic pain is a refractory condition that involves de novo protein synthesis in the  
22 nociceptive pathway. The mechanistic target of rapamycin (mTOR) is a master  
23 regulator of protein translation; however, mechanisms underlying its role in neuropathic  
24 pain remain elusive. Using spared nerve injury-induced neuropathic pain model, we  
25 found that mTOR is preferentially activated in large-diameter dorsal root ganglion  
26 (DRG) neurons and spinal microglia. However, selective ablation of mTOR in DRG  
27 neurons, rather than microglia, alleviated neuropathic pain. We show that injury-  
28 induced mTOR activation promoted transcriptional induction of NPY likely via signal  
29 transducer and activator of transcription 3 (STAT3) phosphorylation. NPY further acted  
30 primarily on Y2 receptors (Y2R) to enhance nociceptor excitability. Peripheral  
31 replenishment of NPY reversed pain alleviation upon mTOR removal, whereas Y2R  
32 antagonists prevented pain restoration. Our findings reveal an unexpected link between  
33 mTOR and NPY in promoting nociceptor sensitization and neuropathic pain, through  
34 NPY/Y2R signaling-mediated intra-ganglionic transmission.

35 **Keywords:** neuropathic pain; mTOR; NPY; STAT3; Y2 receptor; nociceptor;  
36 mechanoreceptor

## 37 INTRODUCTION

38 Chronic pain, the leading cause of long-term human disability, poses a heavy health  
39 burden to the society. Nerve injury-induced neuropathic pain accounts for  
40 approximately one fifth of the chronic pain population (van Hecke et al., 2014). It is  
41 characterized by persistent hyperalgesia, allodynia and spontaneous pain. Long-lasting  
42 sensitization of the nociceptive pathway, leading to a reduced pain threshold, has been  
43 considered a major mechanism mediating the persistent hypersensitivity in neuropathic  
44 pain (Costigan et al., 2009).

45 Accumulating evidence has shown that nerve injury-induced *de novo* gene expression  
46 contributes to the maladaptive responses in both the peripheral and central nociceptive  
47 circuits, thereby promoting nociceptive sensitization and pain hypersensitivity  
48 (Costigan et al., 2009; Melemedjian and Khoutorsky, 2015). Elevation of G protein-  
49 coupled receptors (GPCRs), such as GPR151, coupled with ion channels in the injured  
50 dorsal root ganglion (DRG), has been shown to facilitate the generation of ectopic  
51 action potential in nociceptive neurons and promotes pain (Geppetti et al., 2015; Xia et  
52 al., 2021).

53 Other than ion channels and GPCRs, prominent induction of neuropeptides, including  
54 neuropeptide Y (NPY), galanin (Gal), neurotensin (NTS) and cholecystokinin (CCK),  
55 have also been observed in DRG neurons after nerve injury (Reinhold et al., 2015; Wu  
56 et al., 2016; Xiao et al., 2002). The 36-amino acid peptide, NPY, is one of the most  
57 robustly upregulated neuropeptides in DRG neurons after nerve injury (Wakisaka et al.,

58 1991). However, mechanisms underlying its induction remain unknown. Moreover,  
59 conditional knockdown of spinal cord NPY increased tactile and thermal  
60 hypersensitivity primarily through Y1 receptor (Y1R) in nerve injury-induced  
61 neuropathic pain models (Solway et al., 2011; Nelson and Taylor, 2021), whereas  
62 subcutaneous injection of NPY or Y2 receptor (Y2R) agonist exacerbated pain after  
63 nerve injury, suggesting a biphasic role of NPY in neuropathic pain at different sites  
64 (Sapunar et al., 2011; Tracey et al., 1995; Arcourt et al., 2017). It remains to be  
65 elucidated how NPY was induced after injury and whether NPY plays opposing roles  
66 through different receptors in the nociceptive pathway.

67 The mechanistic target of rapamycin (mTOR), a master regulator of protein translation,  
68 plays a pivotal role in regulating cell growth and metabolism. Deregulation of mTOR  
69 signaling has been linked to various human diseases, including cancer, obesity and  
70 neurodegeneration (Saxton and Sabatini, 2017; Carlin et al., 2018; Laplante and  
71 Sabatini, 2013). Activation of mTOR has been observed in the DRG and spinal cord in  
72 neuropathic pain models, as well as morphine-induced chronic pain (Abe et al., 2010;  
73 Zhang et al., 2013; Xu et al., 2014; Melemedjian et al., 2011; Price and Géranton, 2009).  
74 Pharmacologic blockade of mTOR activity has been demonstrated to reduce pain  
75 (Geranton et al., 2009; Asante et al., 2010; Obara et al., 2011; Tateda et al., 2017;  
76 Norsted Gregory et al., 2010; Xu et al., 2011). However, several studies found that  
77 inhibiting mTOR complex 1 (mTORC1) resulted in unexpected mechanical allodynia,  
78 through an insulin receptor substrate-1 (IRS-1)-dependent negative feedback activation  
79 of extracellular signal-regulated kinase (ERK) in primary sensory neurons

80 (Melemedjian et al., 2013; Melemedjian and Khoutorsky, 2015), leaving the role of  
81 mTOR and underlying mechanisms in pain regulation to be further clarified.

82 Combining genetic manipulation, transcriptomic profiling with electrophysiological  
83 recording, we uncover a previously unrecognized link between nerve injury-triggered  
84 mTOR activation and NPY induction in DRG neurons. We further demonstrate that  
85 mTOR-mediated NPY production enhances nociceptor excitability and promotes pain  
86 hypersensitivity through Y2R in DRG. Although mTOR-related signaling has been  
87 extensively studied, we present the first evidence for mTOR-regulated NPY signaling  
88 in driving neuropathic pain development.

89 **RESULTS**

90 **Nerve injury induces mTOR activation in subsets of DRG neurons and spinal cord**  
91 **microglia**

92 To examine the status of mTOR activation after nerve injury, we carried out western  
93 blot analysis of L4 and L5 DRG and spinal dorsal horn (SDH) tissues from mice at  
94 different time points after the spared nerve injury (SNI) surgery (**Figure 1A**). The  
95 activity of mTOR was assessed by the levels of phosphorylated S6 protein (p-S6), a key  
96 and downstream effector of mTOR. As shown in **Figure 1B and C**, p-S6 was  
97 substantially upregulated in the ipsilateral DRG one day after the nerve injury and lasted  
98 for at least 7 days ( $p < 0.05$ ). These data are consistent with elevated mTOR activity in  
99 DRGs after peripheral nerve injury (Abe et al., 2010).

100 To further determine the identity of cells with mTOR activation, we performed  
101 immunofluorescence analysis using anti-p-S6 antibody along with different markers.  
102 Size frequency analysis showed that expression of p-S6 in DRG neurons was mainly in  
103 medium and large sizes at contralateral and ipsilateral DRGs after SNI (**Figure 1-figure**  
104 **supplement 1A**). In the contralateral DRG, positive p-S6 labeling, reflecting basal  
105 mTOR activity, was observed in a small subset of CGRP<sup>+</sup> peptidergic neurons (9.7%)  
106 but a large fraction of NF160/200<sup>+</sup> neurons, reminiscent of large-sized A-fiber  
107 mechanoreceptors (43.7%). In the ipsilateral DRG, a substantial increase of p-S6<sup>+</sup> cells  
108 in NF160/200<sup>+</sup> large-sized mechanoreceptors (from 43.7% to 71.2%,  $p < 0.01$ ) and  
109 CGRP<sup>+</sup> peptidergic neurons (from 9.7% to 18.7%,  $p < 0.05$ ) was observed 3 days after

110 SNI (**Figure 1D-F**). Notably, no elevation of mTOR activity was observed in IB4<sup>+</sup> non-  
111 peptidergic small neurons ( $p>0.05$ , **Figure 1G**).

112 By contrast, western blot analysis of p-S6 from the SDH tissue extracts detected no  
113 differences between the contralateral and ipsilateral spinal cords following SNI ( $p>0.05$ ,  
114 **Figure 1H and I**). Given that western blot analysis detects the gross mTOR activity in  
115 the SDH, which may mask changes in sparsely distributed cells in the spinal cord, we  
116 carried out dual-labeling of p-S6 with different cellular markers, including NeuN  
117 (neurons), GFAP (astrocytes) and Iba1 (microglia). No changes were observed in p-S6<sup>+</sup>  
118 neurons or astrocytes between the contralateral and ipsilateral SDH within 1 week  
119 following the injury (**Figure 1-figure supplement 1B-D**). However, the number of p-  
120 S6<sup>+</sup> microglia (GFP<sup>+</sup>) in the superficial layers of ipsilateral SDH was robustly increased  
121 from day 3 to 7 post SNI in *Cx3cr1*<sup>EGFP/+</sup> mice ( $p<0.05$ , **Figure 1J and K**). Together,  
122 our results demonstrate that peripheral nerve injury induces mTOR activation mainly  
123 in large-sized DRG mechanoreceptors and SDH microglia.

#### 124 **Blocking mTOR activity delays pain development**

125 To further determine the contribution of mTOR signaling in neuropathic pain, we  
126 administered rapamycin, an mTORC1 inhibitor, by intraperitoneal injection to  
127 systematically blocking the mTORC1 activity. Meanwhile, BrdU was injected into the  
128 mice to label proliferating microglia (**Figure 2A**). Daily intraperitoneal administration  
129 of rapamycin from one day before to 7 days after the SNI significantly inhibited mTOR  
130 activity in both DRG neurons and SDH microglia (**Figure 2-figure supplement 1**).

131 Using von Frey tests, we found that systemic rapamycin administration delayed the  
132 appearance of mechanical allodynia for 5 days after the nerve injury ( $p < 0.05$ , **Figure**  
133 **2B**). Rapamycin treatment also reduced the total number of microglia (Vehicle:  $757.7$   
134  $\pm 15.4$  per  $\text{mm}^2$ , Rapamycin:  $463.1 \pm 20.7$  per  $\text{mm}^2$ ,  $p < 0.001$ ) (**Figure 2C and D**)  
135 and the percentage of proliferative microglia (BrdU<sup>+</sup> Iba1<sup>+</sup>) (Vehicle:  $86.9\% \pm 1.1\%$ ,  
136 Rapamycin:  $73.1\% \pm 2.1\%$ ) in the superficial layers of ipsilateral SDH at day 7 after  
137 SNI (**Figure 2C and E**). These data demonstrated that blocking mTOR signaling  
138 delayed pain and suppressed nerve damage-induced microgliosis.

### 139 **Selective ablation of mTOR in DRG neurons but not in microglia alleviates** 140 **neuropathic pain**

141 To further discern the contributions of neuronal or microglial mTOR in neuropathic  
142 pain, we crossed specific Cre mouse lines (*Adv<sup>cre</sup>* or *Cx3cr1<sup>creER</sup>*) with *Mtor<sup>fl/fl</sup>* mice to  
143 selectively delete *Mtor* gene in primary sensory neurons or microglia, respectively. We  
144 observed complete elimination of p-S6 in DRG neurons and unchanged p-S6 levels in  
145 SDH in *Adv<sup>cre</sup>::Mtor<sup>fl/fl</sup>* (*Mtor-cKO<sup>Adv</sup>*) mice 7 days after SNI (**Figure 3A and B**),  
146 demonstrating the selective removal of *Mtor* in primary sensory neurons. Examination  
147 of sensory perception and motor activities found no significant differences between the  
148 control and *Mtor-cKO<sup>Adv</sup>* mice at basal states (**Figure 3-figure supplement 1**).  
149 However, *Mtor-cKO<sup>Adv</sup>* mice exhibited delayed development of mechanical allodynia  
150 (**Figure 3C**) and cold allodynia (**Figure 3E**) than the controls after SNI, as well as  
151 alleviated heat hyperalgesia (**Figure 3D**). Moreover, *Mtor-cKO<sup>Adv</sup>* mice had lower



152 difference scores in response to mechanical stimulation than the *Mtor<sup>fl/fl</sup>* mice in a two-  
153 chamber CPA assay that assesses the aversive responses to pain, suggesting that mTOR  
154 deletion in DRG neurons alleviated aversive responses to noxious stimuli (**Figure 3F**).

155 To further examine whether microglial mTOR activation also contributes to  
156 neuropathic pain, we selectively deleted *Mtor* in microglia by injecting tamoxifen into  
157 the *Cx3cr1<sup>creER/+</sup>::Mtor<sup>fl/fl</sup>* mice (*Mtor-cKO<sup>MG</sup>* mice) 4-6 weeks before the SNI surgery  
158 (**Figure 4A and Figure 4-figure supplement 1A**) (Gu et al., 2016). Cre-mediated  
159 recombination of *Mtor* gene in the central nervous system (brain and spinal cord) was  
160 detected by PCR analysis (**Figure 4-figure supplement 1B**) and ablation of mTOR in  
161 microglia was verified by immunofluorescence analysis (**Figure 4B**). At day 7 post SNI,  
162 we observed a reduction in the number of microglia (**Figure 4C and D**) and the  
163 percentage of mitotic microglia (BrdU<sup>+</sup> Iba1<sup>+</sup>) (**Figure 4E and F**) in the superficial  
164 layers of ipsilateral SDH in *Mtor-cKO<sup>MG</sup>* mice. However, we were unable to observe  
165 significant differences in mechanical allodynia (**Figure 4G**) or heat hyperalgesia  
166 (**Figure 4H**) between the *Mtor-cKO<sup>MG</sup>* and control mice after SNI (from day 1 to day  
167 7), suggesting that neuropathic pain is spared in the absence of microglial mTOR  
168 signaling.

#### 169 ***Mtor* ablation in DRG neurons suppressed elevation of subsets of nerve injury-** 170 **induced genes**

171 To determine the downstream molecular targets of mTOR in DRG neurons involved in  
172 neuropathic pain, we performed RNA sequencing of DRGs from *Mtor<sup>fl/fl</sup>* and *Mtor-*

173 *cKO<sup>Adv</sup>* mice before and 7 days after SNI surgery. In total, the expression levels of 189  
174 genes (155 upregulated and 34 downregulated), were significantly changed (by at least  
175 two folds,  $p < 0.05$ ) in the injured DRGs 7 days after SNI in *Mtor<sup>fl/fl</sup>* mice (**Figure 5A-**  
176 **C**). A large number of the upregulated genes, including those associated with injury  
177 (*Activating transcription factor 3*, *Atf3* and *Small proline-rich protein 1A*, *Sprr1a*), G-  
178 protein coupled receptors (*Gpcrs*, including *Gpr151* and *Gpr119*), neuropeptides (*Npy*,  
179 *Gal*, and *Nts*), cytokines (*Colony stimulating factor 1*, *Csfl* and *Interleukin 1b*, *Il1b*)  
180 have been previously reported in response to nerve injury (**Figure 5B**) (Wu et al., 2016;  
181 Reinhold et al., 2015; Guan et al., 2016; Peng et al., 2016), verifying the reliability of  
182 the RNA-seq data. Gene ontology analysis demonstrated that injury-affected genes  
183 were primarily enriched in four molecular functions (**Figure 5C**), including receptor  
184 ligand activity, hormone activity and neuropeptide receptor binding and activity.

185 Importantly, approximately 1/5 (32 in 155 genes) of injury-induced genes were  
186 suppressed after mTOR ablation (**Figure 5E**). In particular, the expression of two  
187 neuropeptide genes *Npy* and *Nts*, induced by approximately 73.5 and 11.7 folds after  
188 injury, was strikingly reduced to 3.75 and 0.57 folds after ablation of *Mtor* in DRG  
189 neurons. By contrast, expression of another two injury-induced neuropeptide genes,  
190 such as *Corticotropin releasing hormone* (*Crh*) and *Gal* remained largely unaffected,  
191 suggesting that mTOR specifically regulates the expression of subsets of injury-  
192 responsive genes (**Figure 5E-G**). The reduced expression of *Npy*, *Nts*, and other genes  
193 (as indicated) in *Mtor-cKO<sup>Adv</sup>* mice was further verified by qRT-PCR analysis (**Figure**  
194 **5-figure supplement 1**). Notably, while mTOR was transiently activated during the

195 first week after nerve injury, it may have long-term impacts on downstream molecules.  
196 Collectively, these data demonstrate that mTOR regulates the transcription of a number  
197 of injury-induced genes.

### 198 **Injury-activated mTOR is required for NPY induction in DRG neurons**

199 NPY is widely distributed in the central and peripheral nervous system (Allen et al.,  
200 1983). It is absent in DRG neurons under homeostatic conditions but dramatically  
201 upregulated after peripheral nerve injury (Wakisaka et al., 1991; Xiao et al., 2002).  
202 However, nothing is known about the mechanisms regulating NPY induction after  
203 nerve injury. We also observed prominent induction of *Npy* in DRG neurons after nerve  
204 injury, which lasted for at least 4 weeks with gradually reduced levels after day 14  
205 (**Figure 6A and B**). Immunofluorescence analysis revealed that 94.2% of NPY<sup>+</sup>  
206 neurons were co-labelled with ATF3, a marker for neuronal injury marker (**Figure 6C**  
207 **and D**). Moreover, 89.6% of NPY<sup>+</sup> neurons expressed p-S6 (**Figure 6E and F**), and  
208 co-localized with NF160/200 in the injured DRGs (**Figure 6-figure supplement 1**),  
209 suggesting that NPY is selectively induced in injured large-sized mechanoreceptors  
210 with mTOR activation. It is noteworthy that *Mtor* ablation nearly eliminated NPY  
211 induction (**Figure 6E and G**), indicating that mTOR inactivation suppressed NPY  
212 transcription.

213 Previous studies indicated that the promoter regions of *Npy* and *Nts* genes harbor signal  
214 transducer and activator of transcription 3 (STAT3)-binding site-like elements and that  
215 dominant negative expression of STAT3 attenuated leptin-induced *Npy* and *Nts*

216 expression (Muraoka et al., 2003; Cui et al., 2005). In addition, activated mTOR has  
217 been shown to phosphorylate STAT3 to promote its nuclear entry and gene  
218 transcription (Laplante and Sabatini, 2013). Importantly, a recent study showed that  
219 phosphorylation of STAT3 was elevated in DRG neurons after nerve injury (Chen et  
220 al., 2016). We therefore tested whether phosphorylation of STAT3 might be involved  
221 in mTOR-mediated NPY induction. We found that nerve injury-increased STAT3  
222 phosphorylation was completely blocked after mTOR ablation, suggesting a correlation  
223 between STAT3 phosphorylation and NPY induction (**Fig. 6H**). Together, these data  
224 demonstrate that activation of mTOR is required for nerve injury-induced NPY  
225 elevation in DRG neurons (**Figure 6I**).

#### 226 **Nerve injury-induced NPY enhances nociceptor excitability**

227 NPY has been shown to increase the excitability of DRG neurons (Abdulla and Smith,  
228 1999a). To examine whether mTOR-promoted NPY induction enhances the excitability  
229 of nociceptors, we carried out electrophysiological recording of small-sized nociceptors  
230 at 7 days SNI. As expected, nociceptors from *Mtor<sup>fl/fl</sup>* mice displayed increased number  
231 of action potentials and lower rheobase 7 days after SNI (**Figure 7**). By contrast, the  
232 number of spikes was significantly reduced in mTOR-deficient neurons after injury.  
233 However, incubation of NPY with mTOR-deficient neurons significantly restored the  
234 number of action potentials and reduced rheobase, suggesting that NPY loss contributes  
235 to the reduced nociceptor excitability in the absence of mTOR.

236 Studies have demonstrated different responses of DRG neurons to different NPY

237 receptor agonists (Wiley et al., 1993; Abdulla and Smith, 1999b; Abdulla and Smith,  
238 1999a). For example, Y2R agonists increased neuronal excitability of small DRG  
239 neurons, whereas Y1R agonists barely showed any effects (Abdulla and Smith, 1999a).  
240 We verified the distinct expression pattern of NPY and Y2R on large-sized  
241 mechanoreceptors and small-sized nociceptors by immunofluorescence analysis  
242 (**Figure 7-figure supplement 1**) (Brumovsky et al., 2005). To determine which  
243 receptor mediates NPY-elicited excitatory effects, Y1R or Y2R antagonist was  
244 incubated with DRG neurons for 30 min before NPY addition. We found that blocking  
245 Y2R but not Y1R activity substantially reduced the number of action potentials after  
246 NPY addition, suggesting that Y2R mediates NPY-induced elevated excitation (**Figure**  
247 **7A-C**).

#### 248 **Peripheral NPY replenishment reversed analgesic effects of *Mtor* ablation through** 249 **Y2R**

250 NPY has been shown to elicit biphasic effects in pain processing by binding to different  
251 receptors in DRG or spinal neurons (Brumovsky et al., 2007). Given that mTOR  
252 ablation simultaneously delayed pain onset and suppressed NPY induction, we tested  
253 whether mTOR inactivation alleviated pain via NPY loss. We first administered a small  
254 dose of NPY (0.2 nmol), as previously suggested (Tracey et al., 1995; Brumovsky et  
255 al., 2005), into the hind paw of normal mice and observed prominent mechanical  
256 allodynia and heat hyperalgesia approximately 30 minutes after injection, supporting  
257 the pro-nociceptive effects of peripheral NPY (**Figure 8A-C**). By injecting NPY into

258 the ipsilateral hind paw of *Mtor-cKO<sup>Adv</sup>* mice, we observed robust mechanical allodynia,  
259 and to a lesser extent, heat hyperalgesia in *Mtor-cKO<sup>Adv</sup>* mice (**Figure 8E and F**).  
260 Moreover, blocking Y2R, rather than Y1R, before NPY administration substantially  
261 reduced NPY-induced mechanical allodynia (**Figure 8E**), further supporting the role of  
262 Y2R in mediating NPY-elicited pro-nociceptive effects. Collectively, our data  
263 demonstrate that mTOR-induced NPY production in DRG neurons is essential for the  
264 development of neuropathic pain via Y2R-mediated signaling.

265 **DISCUSSION**

266 Neuropathic pain is a maladaptive response of the nociceptive pathway to the nerve  
267 injury. Both peripheral and central sensitization have been shown to contribute to the  
268 persistent pain (Colloca et al., 2017). Peripheral nociceptor sensitization is a key trigger  
269 in neuropathic pain, as inhibiting nociceptor activity by anesthetics effectively blocks  
270 pain (Colloca et al., 2017). In this study, we uncover a previously unrecognized  
271 mechanism, by which injury-induced mTOR activation and downstream transcriptional  
272 factor STAT3 drives NPY synthesis to enhance nociceptor excitability and promote  
273 pain development through Y2R. Considering the distinct distribution patterns of NPY  
274 and Y2R in large-sized mechanoreceptors and small-sized nociceptors, mTOR-driven  
275 pain may involve an intra-ganglia communication between NPY-expressing  
276 mechanoreceptors and Y2R-expressing nociceptors.

277 Basal levels of mTOR activity are present in a small subset of large-sized myelinated  
278 sensory neurons in naïve mice (Lisi et al., 2015; Geranton et al., 2009). In the present  
279 study, we observed increased mTOR activation predominantly occurs in large sensory  
280 neurons and spinal microglia after nerve injury. While pharmacologically blocking  
281 mTOR activity has raised controversies regarding its role in pain (Obara et al., 2011;  
282 Geranton et al., 2009; Melemedjian et al., 2013; Khoutorsky et al., 2015), we found that  
283 selective ablation of mTOR in primary sensory neurons, which disrupted both  
284 mTORC1 and mTORC2, robustly prevented the early onset of nerve injury-triggered  
285 allodynia and heat hyperalgesia for 2 weeks. Selective ablation of Raptor or Rictor in

286 DRG neurons are needed to distinguish roles of mTORC1 and mTORC2 signaling in  
287 neuropathic pain (Laplante and Sabatini, 2012). In contrast to the ERK activation  
288 following mTORC1 inhibition as previously described (Melemedjian et al., 2013), we  
289 did not observe ERK activation in DRG neurons (data not shown) after genetic  
290 inactivation of mTOR in SNI models. The delayed onset of mechanical allodynia after  
291 mTOR ablation are in line with the temporal activation of mTOR and expression of  
292 downstream effectors after nerve injury, emphasizing a central role of mTOR in  
293 promoting neuropathic pain development. Additional maladaptive changes other than  
294 mTOR signaling may contribute to the late-phase pain.

295 Nerve injury-induced *de novo* synthesis of a large number of molecules are implicated  
296 in the hypersensitive nociception (Wang et al., 2021; Zhao et al., 2017). For example,  
297 injury-induced CSF1 in DRG neurons, a cytokine required for microglial and  
298 macrophage expansion, has recently been shown to contribute to mechanical  
299 hypersensitivity (Yu et al., 2020; Guan et al., 2016; Peng et al., 2016). Also, removal  
300 of the eukaryotic initiation factor 4E-binding protein 1 (4E-BP1), a negative regulator  
301 of protein translation downstream of mTOR, induced pain hypersensitivity through  
302 enhanced translation of neuroligin 1 even in the absence of nerve injury, further  
303 stressing the importance of mTOR-mediated protein synthesis in pain hypersensitivity  
304 (Khoutorsky and Price, 2018; Khoutorsky et al., 2015; Yousuf et al., 2020). Our  
305 findings that mTOR is required for nerve injury-induced *Npy* and *Nts* transcription  
306 demonstrate novel links between mTOR activation to neuropeptide production.



307 Intriguingly, as a serine/threonine kinase that is primarily engaged in translational  
308 control, mTOR is unlikely to directly promote *Npy* or *Nts* transcription. In search for  
309 potential mTOR-regulated transcriptional factors upstream of *Npy* or *Nts* genes, we  
310 observed suppressed phosphorylation of STAT3, but not C-Jun or CREB (data not  
311 shown), in DRG neurons after mTOR deletion. Since STATs-like binding elements are  
312 present in the promoter region of *Npy* gene (Muraoka et al., 2003), it is likely that  
313 activated mTOR induces *Npy* transcription by phosphorylating STAT3, thereby  
314 promoting STAT3 nuclear entry and downstream gene transcription. While previous  
315 studies primarily suggested that mTOR contributes to pain sensitivity through  
316 translational control (Khoutorsky and Price, 2018; Melemedjian and Khoutorsky, 2015),  
317 our study demonstrate a non-translational mechanism of mTOR involving STAT3-  
318 NPY production in pain regulation.

319 Nerve injury often induces nociceptor hyper-excitability to provoke pain  
320 hypersensitivity. However, this hyper-excitability was lost after ablation of mTOR in  
321 DRG neurons, along with elimination of NPY. NPY has been shown to elicit both anti-  
322 nociceptive and pro-nociceptive effects, depending on the subtypes of its receptors in  
323 the central and peripheral nervous system (Brumovsky et al., 2007; Diaz-delCastillo et  
324 al., 2018). We found that NPY was selectively induced in injured large-sized sensory  
325 neurons, suggesting the peripheral effects of NPY. In contrast to previous studies  
326 showing that NPY triggers analgesia by inhibiting superficial dorsal horn interneurons  
327 through Y1R (Taiwo and Taylor, 2002; Miyakawa et al., 2005; Nelson and Taylor,  
328 2021), we observed that peripheral administration of NPY promotes pain via Y2R.

329 Replenishing NPY enhanced nociceptor excitability, while peripherally blocking Y2R,  
330 but not Y1R, prevented these effects, suggesting that mTOR drives NPY production to  
331 enhance nociceptor excitability through Y2R. Consistent with our observations, a  
332 previous study indicated that Y1R agonist had no effect on small DRG neurons,  
333 whereas Y2R agonist enhanced neuronal excitability (Abdulla and Smith, 1999a). A  
334 reasonable explanation is that Y2R attenuated calcium-sensitive potassium-  
335 conductance, thereby inducing nociceptor depolarization and excitability (Abdulla and  
336 Smith, 1999a; Abdulla and Smith, 1999b).

337 It is noteworthy that NPY elevation is exclusively observed in large-diameter  
338 mechanoreceptors, whereas Y2R is predominantly distributed in small-diameter  
339 nociceptors (Brumovsky et al., 2005). The distinct but adjacent distribution of NPY  
340 suggests a paracrine ‘somatic cross excitation’ model within DRGs, by which NPY  
341 released from the large-diameter injured neurons acts on neighboring small-diameter  
342 Y2R-expressing neurons (Brumovsky et al., 2007). Through intra-ganglionic  
343 transmission (Brumovsky et al., 2007), NPY signals derived from large injured  
344 mechanoreceptors are able to sensitize Y2R-expressing nociceptors, thereby  
345 contributing to mechanical allodynia. In line with this concept, blocking Y2R  
346 effectively alleviated mechanical allodynia. Our findings thus provide an important  
347 mechanism for mechanical allodynia engaging mTOR-driven NPY-Y2R  
348 communication between mechanoreceptors and nociceptors in neuropathic pain. Other  
349 than NPY, mTOR-driven expression of NTS and GPCRs likely coordinately contribute  
350 to the full development of neuropathic pain.

351 Microglia activation in SDH have been shown to contribute to neuropathic pain (Inoue  
352 and Tsuda, 2018). Moreover, mTOR-mediated metabolic reprogramming are required  
353 for induction of inflammatory factors and cytokines in microglia (Hu et al., 2019),  
354 which indicated that mTOR activation in microglia may be involved in neuropathic  
355 pain. We found that *Mtor* deletion in microglia reduced microgliosis; however, it did  
356 not have significant effects on neuropathic pain. This is likely due to the fact that mTOR  
357 was activated in less than 50% of microglia in the SDH and that mTOR ablation only  
358 partially reduced microgliosis, which might be insufficient to inhibit pain development.  
359 Consistent with this notion, removal of microglia only ameliorated mechanical  
360 allodynia during the first 3 days after nerve injury, whereas removal of both microglia  
361 and peripheral monocytes/macrophage prevented neuropathic pain development (Peng  
362 et al., 2016).

363 In summary, we demonstrate that nerve injury-induced aberrant mTOR activation in  
364 sensory neurons promotes pain development. While mTOR has been shown to affect  
365 the expression or function of hundreds of molecules, the present study is the first that  
366 links mTOR to NPY signaling in sensitizing nociceptive pathway to drive neuropathic  
367 pain. As mTOR inhibitors are in clinical use and Y2R receptor antagonists are readily  
368 available, our findings also provide new perspectives for clinically treating neuropathic  
369 pain by peripherally modulating mTOR and NPY-Y2R signaling.

370

371 **Materials and Methods**

372 **Key resources table**

| Reagent type (species) or resource | Designation                                               | Source or reference       | Identifiers                        |
|------------------------------------|-----------------------------------------------------------|---------------------------|------------------------------------|
| Antibody                           | Rabbit anti-p-S6 ribosomal protein-Ser <sup>235/236</sup> | Cell Signaling Technology | Cat# 4858; RRID: AB_916156         |
| Antibody                           | Rabbit anti-S6 ribosomal protein                          | Cell Signaling Technology | Cat# 2217; RRID: AB_331355         |
| Antibody                           | Rabbit anti-NPY                                           | Cell Signaling Technology | Cat# 11976; RRID: AB_2716286       |
| Antibody                           | Rabbit anti-p-STAT3-Ser <sup>727</sup>                    | Cell Signaling Technology | Cat# 9134; RRID: AB_331589         |
| Antibody                           | Rabbit anti-NPY Y2 receptor                               | Neuromics                 | Cat# RA14112; RRID: AB_2315615     |
| Antibody                           | Rat anti-5-Bromo-2'-deoxyuridine                          | Abcam                     | Cat# ab6326; RRID: AB_305426       |
| Antibody                           | Goat anti-GFP                                             | Abcam                     | Cat# ab5450; RRID: AB_304897       |
| Antibody                           | Mouse anti- $\beta$ -Actin                                | Sigma-Aldrich             | Cat# A1978; RRID: AB_476692        |
| Antibody                           | Mouse anti-Neurofilament 160/200                          | Sigma-Aldrich             | Cat# n2912; RRID: AB_477262        |
| Antibody                           | Mouse anti-GFAP                                           | Synaptic Systems          | Cat# 173011; RRID: AB_2232308      |
| Antibody                           | Mouse anti-NeuN                                           | Millipore                 | Cat# MAB377; RRID: AB_2298772      |
| Antibody                           | Rabbit anti-Iba1                                          | Wako                      | Cat# 019-19741; RRID: AB_839504    |
| Antibody                           | Mouse anti-p-S6-Ser <sup>235/236</sup>                    | Santa Cruz Biotechnology  | Cat# sc-293144                     |
| Antibody                           | Mouse anti-CGRP                                           | Santa Cruz Biotechnology  | Cat# sc-57053; RRID: AB_2259462    |
| Antibody                           | Mouse anti-ATF3                                           | Santa Cruz Biotechnology  | Cat# sc-81189; RRID: AB_2058591    |
| Antibody                           | Alexa Fluor 488-donkey anti-goat                          | Invitrogen, Thermo Fisher | Cat# A11055; RRID: AB_2534102      |
| Antibody                           | Alexa Fluor 488-donkey anti-rabbit                        | Invitrogen, Thermo Fisher | Cat# A21206; RRID: AB_2535792      |
| Antibody                           | Alexa Fluor 488-donkey anti-mouse                         | Invitrogen, Thermo Fisher | Cat# A21202; RRID: AB_141607       |
| Antibody                           | Alexa Fluor 555-donkey anti-mouse                         | Invitrogen, Thermo Fisher | Cat# A31570; RRID: AB_2536180      |
| Antibody                           | Alexa Fluor 555-donkey anti-rabbit                        | Invitrogen, Thermo Fisher | Cat# A31572; RRID: AB_162543       |
| Antibody                           | Cy3-donkey anti-rat                                       | Jackson ImmunoResearch    | Cat# 712-165-153; RRID: AB_2340667 |

|                                          |                                                                   |                                             |                                    |
|------------------------------------------|-------------------------------------------------------------------|---------------------------------------------|------------------------------------|
| Antibody                                 | Horseradish peroxidase (HRP)-conjugated goat anti-rabbit          | Jackson ImmunoResearch                      | Cat# 111-035-003; RRID: AB_2313567 |
| Antibody                                 | Horseradish peroxidase (HRP)-conjugated goat anti-mouse           | Jackson ImmunoResearch                      | Cat# 115-035-146; RRID: AB_2307392 |
| peptide, recombinant protein             | NPY                                                               | Tocris                                      | Cat# 1153                          |
| peptide, recombinant protein             | scrambled NPY                                                     | Tocris                                      | Cat# 3903                          |
| chemical compound, drug                  | BIBO3304 trifluoroacetate                                         | Tocris                                      | Cat# 2412; CAS: 191868-14-1        |
| chemical compound, drug                  | BIIE0246                                                          | Tocris                                      | Cat# 1700; CAS: 246146-55-4        |
| chemical compound, drug                  | BIIE0246 hydrochloride                                            | Tocris                                      | Cat# 7377                          |
| chemical compound, drug                  | Isolectin GS-IB4, Alexa Fluor™ 568 Conjugate                      | Invitrogen, Thermo Fisher                   | Cat# I21412                        |
| chemical compound, drug                  | Rapamycin                                                         | Selleck Chemicals                           | Cat# S1039; CAS: 53123-88-9        |
| chemical compound, drug                  | 5-Bromo-2'-deoxyuridine                                           | Sigma-Aldrich                               | Cat#: 19-160; CAS: 59-14-3         |
| Commercial assay or kit                  | Multiple-color immunochemistry kit                                | Absin                                       | Cat# abs50012                      |
| Commercial assay or kit                  | RNeasy micro kit                                                  | Qiagen                                      | Cat# 74004                         |
| Commercial assay or kit                  | PrimeScript RT Reagent Kit                                        | TaKaRa                                      | Cat# RR037A                        |
| Commercial assay or kit                  | SYBR Premix Ex Taq™                                               | TaKaRa                                      | Cat# DRR041A                       |
| Strain, strain background (Mus musculus) | C57BL/6J                                                          | Shanghai Slac Laboratory Animal Corporation | Mouse: C57BL/6J                    |
| Strain, strain background (Mus musculus) | Cx3cr1 <sup>EGFP/+</sup> ; B6.129P-Cx3cr1 <sup>tm1Litt/J</sup>    | The Jackson Laboratory                      | Stock#: 005582                     |
| Strain, strain background (Mus musculus) | Mtor <sup>fl/fl</sup> ; B6.129S4-Mtor <sup>tm1.2Koz/J</sup>       | The Jackson Laboratory                      | Stock#: 011009                     |
| Strain, strain background (Mus musculus) | Advillin <sup>cre</sup> ; B6.129P2-Avil <sup>tm2(cre)Fawa/J</sup> | The Jackson Laboratory                      | Stock#: 032536                     |

|                                          |                                                                                                                                                                                        |                        |                                                                                                                                                                                                                                                               |
|------------------------------------------|----------------------------------------------------------------------------------------------------------------------------------------------------------------------------------------|------------------------|---------------------------------------------------------------------------------------------------------------------------------------------------------------------------------------------------------------------------------------------------------------|
| Strain, strain background (Mus musculus) | Cx3cr1 <sup>creER/+</sup> .B6.129P2(Cg)-Cx3cr1 <sup>tm2.1(cre/ERT2)Litt/WganJ</sup>                                                                                                    | The Jackson Laboratory | Stock#: 011009                                                                                                                                                                                                                                                |
| Strain, strain background (Mus musculus) | Cx3cr1 <sup>creER/+</sup> ::Mtor <sup>fl/fl</sup>                                                                                                                                      | This paper             | N/A                                                                                                                                                                                                                                                           |
| Strain, strain background (Mus musculus) | Advillin <sup>cre</sup> :: Mtor <sup>fl/fl</sup>                                                                                                                                       | This paper             | N/A                                                                                                                                                                                                                                                           |
| Sequence-based reagent                   | Primers used for Mtor <sup>fl/fl</sup> :<br>Mtor-P1 (5'-GCTCTTGAGGCAAATGC CACTATCACC-3'), Mtor-P2 (5'- TCATTACC TTTCATCAGCCAGCAGT T-3'), Mtor-P3 (5'- TTCATTCCCTTGAAAGCC AGTCTCACC-3') | This paper             | N/A                                                                                                                                                                                                                                                           |
| Sequence-based reagent                   | Primers for RT-qPCR, see Table 1                                                                                                                                                       | This paper             | N/A                                                                                                                                                                                                                                                           |
| Software, algorithm                      | ImageJ                                                                                                                                                                                 | NIH                    | <a href="https://imagej.nih.gov/ij">https://imagej.nih.gov/ij</a>                                                                                                                                                                                             |
| Software, algorithm                      | ANY-maze                                                                                                                                                                               | Stoelting              | <a href="https://www.anymaze.co.uk/index.htm">https://www.anymaze.co.uk/index.htm</a>                                                                                                                                                                         |
| Software, algorithm                      | pClamp                                                                                                                                                                                 | Molecular Devices      | <a href="https://www.moleculardevices.com/products/axonpatch-clamp-system/acquisition-and-analysissoftware/pclamp-software-suite">https://www.moleculardevices.com/products/axonpatch-clamp-system/acquisition-and-analysissoftware/pclamp-software-suite</a> |
| Software, algorithm                      | Prism                                                                                                                                                                                  | GraphPad               | <a href="https://www.graphpad.com/scientificsoftware/prism">https://www.graphpad.com/scientificsoftware/prism</a>                                                                                                                                             |
| Software, algorithm                      | R                                                                                                                                                                                      | R Foundation           | <a href="https://www.r-project.org/">https://www.r-project.org/</a>                                                                                                                                                                                           |

373

374

375 **Animals**

376 Adult male mice (8-12 weeks) were used for biochemical and behavioral tests, and  
377 young mice (4-6 weeks) for whole-cell patch clamp recording. C57BL/6J mice were  
378 purchased from Shanghai Slac Laboratory Animal Corporation (China). *Cx3cr1<sup>EGFP/+</sup>*,  
379 *Cx3cr1<sup>creER/+</sup>*, *Mtor* floxed (*Mtor<sup>fl/fl</sup>*) and *Advillin<sup>cre</sup>* (*Adv<sup>cre</sup>*) mice with C57BL/6J  
380 background were purchased from the Jackson Laboratory (ME, USA). All animals were  
381 housed under a 12-h light/dark cycle with food and water available. To selective  
382 knockout the *Mtor* gene in microglia, mice bearing the floxed allele of the *Mtor* gene  
383 (*Mtor<sup>fl/fl</sup>*) were crossed with *Cx3cr1<sup>creER/+</sup>* mice. *Cx3cr1<sup>creER/+</sup>::Mtor<sup>fl/fl</sup>* mice received  
384 two doses of 10 mg tamoxifen citrate (TAM, Meilunbio, China) or vehicle in 48-hour  
385 intervals. TAM induced the expression of Cre recombinase in both resident microglia  
386 and peripheral monocytes. Since monocytes have a rapid turnover rate, Cre expression  
387 is eliminated in peripheral monocytes but maintained in resident microglia 4-6 weeks  
388 after TAM induction (Parkhurst et al., 2013), thus allowing selective deletion of *Mtor*  
389 in microglia (*Mtor-cKO<sup>MG</sup>*) but not in monocytes. Control mice were  
390 *Cx3cr1<sup>creER/+</sup>::Mtor<sup>fl/fl</sup>* littermates without TAM induction and *Cx3cr1<sup>creER/+</sup>* mice with  
391 TAM induction. For selective ablation of *Mtor* in DRG sensory neurons, *Mtor<sup>fl/fl</sup>* mice  
392 were crossed with *Adv<sup>cre</sup>* mice to obtain the *Adv<sup>cre</sup>::Mtor<sup>fl/fl</sup>* (*Mtor-cKO<sup>Adv</sup>*) mice. *Mtor-*  
393 *cKO<sup>Adv</sup>* mice enabled *Mtor* deletion in DRG neurons but leave spinal cord unaffected.  
394 Control mice were *Mtor<sup>fl/fl</sup>* littermates without Cre promotor.

### 395 **Cre-mediated recombination of the *Mtor<sup>fllox</sup>* allele**

396 Primers used for analyses of *Mtor* floxed alleles were as the following: *Mtor-P1* (5'-  
397 GCTCTTGAGGCAAATGCCACTATCACC-3'), *Mtor-P2* (5'- TCATTACC

398 TTTCATCAGCCAGCAGTT-3'), *Mtor-P3* (5'-TTCATTCCCTTGAAAGCC  
399 AGTCTCACC-3'). Primer pair P1/P2 was used for genotyping floxed mTOR alleles  
400 that generated a 480 bp DNA fragment in PCR (Rissson et al., 2009). Upon Cre-  
401 mediated recombination, *P1/P3* pair produced a recombined *Mtor* gene fragment of 520  
402 bp with excision of exons 1-5 (**Figure 4-figure supplement 1**) (Rissson et al., 2009).

### 403 **Neuropathic pain model**

404 Spared nerve injury (SNI) models were used to induce neuropathic pain as previously  
405 described (Decosterd and Woolf, 2000). Mice were anesthetized with sodium  
406 pentobarbital (100 mg/kg) intraperitoneally. The left hindlimb was shaved, and the skin  
407 was disinfected with iodophor. After blunt separation of biceps femoris muscle, 3 distal  
408 branches of sciatic nerve were exposed and the tibial and common peroneal nerves were  
409 ligated with 5-0 silk sutures, with care to avoid injury to the sural nerve. The ligated  
410 branches were then transected distal to the ligature and a 2-3 mm distal nerve stump  
411 was removed. To minimize the number of animals used in the experiments, the right  
412 hindlimb was performed with a sham surgery after sciatic nerve exposure without nerve  
413 ligation and transection. To analyze NPY transport from the DRG to the spinal cord,  
414 we ligated the ipsilateral L4 central axonal branches immediately after SNI. After the  
415 surgery, the incision was closed using 5-0 silk sutures. The injured side was then  
416 regarded as the ipsilateral side, and the uninjured as the contralateral one.

### 417 **Western Blotting**



418 Bilateral lumbar 4 and 5 (L4-L5) DRGs and dorsal horns of L4-L5 spinal cord were  
419 isolated at certain time points after SNI surgery, snap-frozen in liquid nitrogen and  
420 stored at -80°C. Tissues were homogenized in RIPA lysis buffer (Beyotime, China)  
421 with protease inhibitor (Cat# S8830, Sigma-Aldrich, MO, USA) and phosphatase  
422 inhibitor (Cat# A32961, Thermo Fisher, MA, USA) using ultrasonic cell disruptor. The  
423 homogenates were centrifuged at 4 °C for 30 minutes at 10,000 g and the supernatants  
424 were collected. Proteins were separated by 10% SDS-polyacrylamide gels and  
425 transferred to polyvinylidene difluoride membranes (Millipore, Germany), followed by  
426 blocking, primary antibodies and horseradish peroxidase (HRP)-conjugated secondary  
427 antibodies (1:10000, Jackson ImmunoResearch, PA, USA) incubation. The proteins  
428 were detected using enhanced chemiluminescence reagents (ECL, Amersham Pharmacia  
429 Biotech, NJ, USA) according to the manual.

#### 430 **Immunofluorescence analysis**

431 After deeply anaesthetized with sodium pentobarbital, mice were perfused with saline  
432 and subsequently 4% paraformaldehyde (PFA, Sigma-Aldrich). The spinal cord and  
433 L4-L5 DRGs were dissected, post-fixed in 4% PFA, and transferred to 30% sucrose in  
434 0.1 M phosphate buffer (pH=7.2) for 2 days. Samples were embedded in optimal cutting  
435 temperature (OCT) and transverse sections were cut using freezing microtome (Lecia  
436 Biosystems, Germany) at a thickness of 15 µm. To label Isolectin B4 (IB4)-positive  
437 neurons in DRG, slices were blocked with 10% (wt/vol) normal bovine serum albumin  
438 (BSA) for 1 hour at room temperature, and incubated with 1 µg/mL IB4 diluted in  
439 phosphate buffered saline (PBS) at room temperature for 2 hours. Sections were washed

440 with Tris buffered saline (TBS) and then incubated with anti-p-S6 (1:1000) antibody.

441 For staining with other antibodies, sections were antigen-retrieved in citrate buffer (10

442 mM sodium citrate, 0.05% Tween-20, pH 6.0) or Tris-EDTA (10 mM Tris, 1 mM

443 EDTA, 0.05% Tween-20, pH 9.0) as appropriate at 95 °C for 20 minutes and

444 permeabilized with 0.5% Triton X-100 for 10 minutes at room temperature. After

445 blocked with 10% (wt/vol) BSA, sections were incubated overnight at 4 °C with

446 following primary antibodies: rabbit anti-p-S6 (1:1000), mouse anti-p-S6 (1:2000 -

447 1:4000), mouse anti-NeuN (1:1000), mouse anti-NF160/200 (1:2000), mouse anti-

448 CGRP (1:1000), rat anti-BrdU (1:800), and goat anti-GFP (1:1000), rabbit anti-Iba1

449 (1:800), rabbit anti-NPY (1:1000), mouse anti-GFAP (1:800), mouse anti-ATF3

450 (1:200), rabbit anti-p-STAT3 (Ser727) (1:500). Sections were then washed in TBS with

451 0.5% tween (TBS-T) and incubated with appropriate secondary antibodies (1:1000) for

452 1.5 hours at room temperature. For NPY and Y2R staining, since both anti-NPY and

453 Y2R antibodies were raised in rabbits, the multiple-color immunocytochemistry kit (Cat#

454 abs50012, Absin, China) was used following the manufacturer's instructions. The

455 specificity of the staining using this kit was first validated by double staining of rabbit

456 anti-NPY and Iba1 antibodies that showed no overlaps. Following the anti-NPY

457 incubation, rabbit horseradish peroxidase (HRP)-conjugated secondary antibody

458 (1:1000) was applied and incubated for 1.5 hours. Sections were then washed in TBS-

459 T and incubated with Tyramide Signal Amplification (TSA) reagent for 10 minutes.

460 Antibody eluent (Cat# abs994, Absin) was used to wash out anti-NPY and HRP-

461 conjugated antibody. After washing, sections were incubated with anti-Y2R antibody

462 (1:500) and followed by incubation with appropriate secondary antibodies (1:1000)  
463 according to species of the first antibody. DAPI (Beyotime) was used to label cell nuclei  
464 in tissue sections. The immunofluorescence images were captured by FV-1200  
465 confocal microscope (Olympus, Japan). The density or percentage of positive cells in  
466 SDH and DRGs were counted and calculated using 3 sections from each animal. Mean  
467 intensity of interested regions were evaluated using *ImageJ* software.

### 468 **Drug administration**

469 BrdU was used to label proliferating cells in the spinal cord after the SNI surgery. The  
470 BrdU labeling procedure was carried out as described before (Gu et al., 2016), with two  
471 intraperitoneal injections (100 mg/kg) daily one day before the surgery until 7 days  
472 post-surgery. For intraperitoneal treatment of rapamycin, mice were administrated with  
473 rapamycin (5 mg/kg) or vehicle daily one day before SNI until 7 days post-surgery. For  
474 local intraplantar (i.pl.) injection, drugs (0.2 nmol NPY, 0.2 nmol scrambled NPY, 5  
475 nmol BIBO3304 trifluoroacetate or 50 nmol BIIE0246) in 20  $\mu$ l saline were injected  
476 using a syringe with a 30-gauge needle. Dosages of NPY and its antagonists were  
477 referred to the previous studies (Tracey et al., 1995; Sapunar et al., 2011). NPY receptor  
478 antagonists were injected 1 hour before NPY injection. To assess the effects after i.pl.  
479 injection, behavioral tests were finished in 30-40 minutes after NPY or scrambled  
480 peptide injection. The von Frey and Hargreaves tests were used for an interval of at  
481 least 4 hours.

### 482 **RNA sequencing**

483 Bilateral SNI were performed in *Mtor<sup>fl/fl</sup>* and *Mtor-cKO<sup>Adv</sup>* mice to minimize the animals  
484 used in the experiment. In total, 4 lumbar DRGs (bilateral L4 and L5 DRGs) were  
485 collected from each mouse before or 7 days after SNI. RNAs were isolated using  
486 RNeasy micro kit (Cat# 74004, QIAGEN, Germany) according to the manufacturer's  
487 instructions. RNA sequencing (RNA-seq) libraries were constructed and sequenced by  
488 BGISEQ-500 (BGI, China). After quality control, the raw RNA-seq data were filtered  
489 to obtain the clean data used for alignment to the mouse genome (*Mus musculus*  
490 GRCm38.p5, NCBI). Based on these read counts, normalization and differential gene  
491 expression were performed using DESeq2 on *R* (version 3.5.3). Genes with fragments  
492 per kilobase million (FPKM) lower than 1 (FPKM<1) in all groups were excluded from  
493 the subsequent analyses. Statistical significance of differentially expressed genes  
494 (DEGs) was calculated based on the raw counts of individual genes, with an absolute  
495 fold change greater than 2 and adjusted p-value (q-value) less than 0.05.

496 Volcano plots and heatmaps were visualized by *R* (the *ggplot2* and *gplots* packages,  
497 respectively). Gene Ontology (GO) enrichment in the molecular function category were  
498 visualized by *R* (bioconductor package "org.Hs.eg.db" and "cluster profiler" package).

#### 499 **Quantitative RT-PCR**

500 Total RNA from DRG was extracted using RNeasy micro kit and reverse-transcribed  
501 using PrimeScript RT Reagent Kit (Cat# RR037A, TaKaRa, Japan). Real-time PCR  
502 was performed using the SYBR Premix Ex Taq™ (Cat# DRR041A, Takara) on a  
503 LightCycler 480 Instrument II Real-Time PCR Detection System (Roche). Primer

504 sequences are provided in the **Table 1**. The relative expression was measured using the  
505  $2^{-\Delta\Delta Ct}$  method. Briefly, the threshold cycle (Ct) values of target genes were determined  
506 automatically by LightCycler 480 II software.  $\Delta Ct = Ct_{(\text{Target genes})} - Ct_{\beta\text{-actin}}$ .  $\Delta\Delta Ct =$   
507  $\Delta Ct_{(\text{Target genes})} - \Delta Ct_{(\text{average } \Delta Ct \text{ of control})}$ . Relative fold changes were determined by  $2^{-\Delta\Delta Ct}$   
508 and normalized to the expression levels of *Actin* (*Livak and Schmittgen, 2001*).

### 509 **Whole-cell patch clamp recording**

510 Mice were anesthetized with sodium pentobarbital before sterilized with 75% alcohol.  
511 L4 and L5 DRGs were carefully collected on ice and digested with collagenase IV (0.2  
512 mg/mL, Cat# LS004188, Worthington, NJ, USA) and dispase-II (3 mg/mL, Cat#  
513 D4693, Sigma-Aldrich) for 60 min at 37 °C. The cell suspension was centrifuged at  
514 500 g for 10 min through a cushion of 15% BSA (Cat# A9205, Sigma-Aldrich) in order  
515 to eliminate most of the cellular debris. The cell pellet was resuspended in Neurobasal  
516 medium (Cat# 21103049, Thermo Fisher Scientific) with B27 (Cat# 17504-044,  
517 Invitrogen, Thermo Fisher Scientific) and NGF supplement (50 ng/mL, Cat# 13257-  
518 019, Gibco, Thermo Fisher Scientific) and seeded onto glass coverslips coated with  
519 poly-D-lysine (Cat# P7280, Sigma-Aldrich) and cultured in 5% CO<sub>2</sub> incubator at 37 °C  
520 for at least 2 h before recording. For drug treatment, cultured DRG neurons were  
521 incubated with 300 nM NPY for 30 min before recording. To antagonize Y1R or Y2R,  
522 BIBO3304 trifluoroacetate (BIBO3304, 1 μM) or BIIE0246 hydrochloride (1 μM) was  
523 replenished respectively into medium 30 min before NPY addition.

524 Whole-cell patch clamp recordings were carried out at room temperature using a

525 Multiclamp 700B amplifier (Molecular Devices, CA, USA). The resistances of  
526 borosilicate glass electrodes were measured ranging from 3 to 5 M $\Omega$ . The intracellular  
527 pipette solution contained (in mM) 135 K-gluconate, 6 NaCl, 10 HEPES, 0.5 EGTA,  
528 10 Na<sub>2</sub>-phosphocreatine, 4 Mg-ATP, 0.3 Na<sub>2</sub>-GTP, and was adjusted to pH 7.2 using  
529 KOH. The extracellular solution was composed of (in mM) 150 NaCl, 5 KCl, 2.5 CaCl<sub>2</sub>,  
530 1 MgCl<sub>2</sub>, 10 HEPES, and 10 glucose, and was adjusted to pH 7.4 by NaOH. Action  
531 potential firing and resting membrane potential (RMP) were recorded from small-  
532 diameter neurons (< 20  $\mu$ m). Data were collected from neurons with stable RMP  
533 negative than -40 mV. Action potentials were evoked by current injection steps. Data  
534 were digitized with Digidata 1440A (Molecular Devices), and analyzed by *pClamp*  
535 software (Version 10.6, Molecular Devices).

### 536 **Behavioral tests**

537 The following behavioral tests were conducted in a blinded manner and during daytime  
538 (light cycle). For all experiments, experimenters were blinded to genotypes or  
539 experimental manipulation. All the apparatuses and cages were sequentially wiped with  
540 70% ethanol and ddH<sub>2</sub>O then air-dried between stages.

#### 541 *von Frey tests*

542 *von Frey* tests were used to evaluate 50% paw withdrawal threshold (50% PWT) during  
543 the light cycle. In brief, individual mouse was habituated in an opaque plexiglas  
544 chamber on a wire mesh platform for 30 minutes prior to test. Testing was performed  
545 using a set of von Frey filaments (0.008-2 g, North Coast Medical, CA, USA). Each

546 filament was applied to the lateral part of plantar surface of the mouse hind paw  
547 vertically for up to 3 seconds from the bottom. Positive response was determined as a  
548 sharp withdrawal, shaking or licking of the limb. The 50% PWT was determined by the  
549 up-down method (Dixon, 1965). Test was carried out at 1 day before SNI (baseline)  
550 and at 1, 3, 5, and 7 days post-surgery.

#### 551 *Hargreaves tests*

552 Thermal sensitivity was examined using Hargreaves radiant heat apparatus (IITC Life  
553 Science, CA, USA). The basal paw withdrawal latency was adjusted to 9-12 s, with a  
554 cutoff of 20 s to avoid tissue damage.

#### 555 *Hot plate tests*

556 Mice were placed on the hot plate (IITC Life Science) at 50, 52 or 56 °C and the reaction  
557 time was scored when the animal began to exhibit signs of pain avoidance such as  
558 jumping or paw licking. Animals that did not respond to the noxious heat stimulus after  
559 40 s were removed from the plate.

#### 560 *Acetone tests*

561 For cold allodynia, 20 µL acetone was applied to the ventral surface of a hind paw, and  
562 then the mouse's response was observed for 60 s. The duration of the mouse responding  
563 to acetone, such as withdrawal or flick of the paw, was recorded.

#### 564 *Rotarod tests*

565 A Rotarod system (Panlab, Spain) was used to assess motor function. Mice were tested

566 in 3 separated trials with a 10 min interval. During the tests, the speed of rotation was  
567 accelerated from 4 to 40 rpm over a 5 min period. The falling latency was recorded.

568 *Open field tests*

569 Mice were placed in the middle of a novel open field arena (45 cm length × 45 cm width  
570 × 30 cm height) under normal light conditions. Using *ANY-maze* software (Stoelting,  
571 IL, USA), the distance the animal walked in 10 min was recorded.

572 *Conditioned place aversion (CPA) tests*

573 CPA experiments were conducted in a two-chamber device (50×25 cm) at day 15 post  
574 SNI. The CPA protocol included pre-conditioning (baseline), conditioning, and post-  
575 conditioning phases (10 min during each phase). Animals spending > 500 s or < 100 s  
576 of the total time in either chamber in the pre-conditioning phase were eliminated from  
577 further analysis. Immediately following the pre-conditioning phase, the mice  
578 underwent conditioning for 10 min. During conditioning, one of the two chambers was  
579 paired with the mechanical stimuli. The mechanical stimulus was repeated every 10 s  
580 with a 0.16 g von Frey hair on the left hind paw when the mouse enters into the  
581 condition chamber. During the post-conditioning phase, the animals did not receive any  
582 stimuli and had free access to both compartments for a total of 10 min. Animal  
583 movements in each of the chambers were recorded, and the time spent in both chambers  
584 was analyzed using *Any-maze* software. Difference scores were defined as post-  
585 conditioning time subtracted from preconditioning time spent in the stimuli-paired  
586 chamber.



587 **Data availability**

588 Sequencing data have been deposited in GEO under accession codes GSE184014. All  
589 data generated or analysed during this study are included in the manuscript and  
590 supporting file; Source Data files have been provided for Figures 1, 2, 3, 4, 6, 7, and 8,  
591 and corresponding supplementary figures.

592 **Statistical analysis**

593 Statistical analyses were performed using *GraphPad Prism* (Version 8.0.1, CA, USA).  
594 Quantitative measurements are presented as mean  $\pm$  standard errors of the means (SEM).  
595 Measurements lies outside two standard deviations (SD) are excluded. Statistical  
596 differences in comparison to the control group were analyzed using paired or unpaired  
597 t-tests as appropriate. One-way (for multiple comparisons) or two-way ANOVA (for  
598 multiple time points) with Bonferroni's *post hoc* tests were used for experiments with  
599 more than 2 groups. Significance was considered with  $p$  value  $< 0.05$ . Regarding  
600 replication, every mouse represents a replicate, and the number of replicates and  
601 additional information on statistics (sample sizes, tests and  $p$  values) are mentioned for  
602 each experiment in the figure legend.

603 **Study approval**

604 All experiments were conducted in the Zhejiang University School of Medicine. The  
605 use and care of animals in all experiments followed the guidelines of The Tab of Animal  
606 Experimental Ethical Inspection of the First Affiliated Hospital, College of Medicine,  
607 Zhejiang University (No. 2017054).

608 **Acknowledgements**

609 We thank Dr. Zhenzhong Xu for discussions and suggestions on experimental design  
610 and technical support, Drs. Chong Liu and Liang Wang for generously providing  
611 transgenic mice, and Drs. Kaiyuan Li, Zhongya Wei, and Xiaobo Wu for the help with  
612 whole-cell patch clamp recording. We are grateful to research assistants Sanhua Fang  
613 and Daohui Zhang at the Core Facilities of Zhejiang University Institute of  
614 Neuroscience.

615 **Funding**

616 This work was supported by National Natural Science Foundation of China (81772382  
617 and 32070974), National Key Research and Development Program of China  
618 (2017YFA0104200), Science Technology Department of Zhejiang Province  
619 (2020C03042), the Fundamental Research Funds for the Central Universities of China  
620 (2019FZA7009), and the Central Universities granted by Zhejiang University (No.  
621 2021FZZX005-29).

622 **Competing interests**

623 The authors have declared that no conflict of interest exists.

624 **Author contributions**

625 Lunhao Chen: Conceptualization; Resources; Data curation; Software; Formal analysis;  
626 Investigation; Visualization; Methodology; Writing – original draft; Project  
627 administration; Writing - review and editing. Yaling Hu: Conceptualization; Data  
628 curation; Software; Formal analysis; Investigation; Methodology; Writing - original

629 draft; Writing - review and editing. Siyuan Wang: Data curation; Investigation;  
630 Methodology; Writing - original draft. Kelei Cao: Data curation; Software; Formal  
631 analysis. Weihao Mai: Software. Weilin Sha: Data curation. Ma Huan: Writing - review  
632 and editing. Yong-Jing Gao: Methodology; Writing - review and editing. Shumin Duan:  
633 Resources; Supervision; Funding acquisition; Methodology. Yue Wang: Resources;  
634 Data curation; Formal analysis; Supervision; Funding acquisition; Validation;  
635 Methodology; Writing - original draft; Project administration; Writing - review and  
636 editing. Zihua Gao: Conceptualization; Data curation; Formal analysis; Supervision;  
637 Funding acquisition; Validation; Investigation; Writing - original draft; Project  
638 administration; Writing - review and editing.  
639

640 **REFERENCES**

- 641 Abdulla, F. A. and Smith, P. A. (1999a). Nerve injury increases an excitatory action of neuropeptide Y  
642 and Y2-agonists on dorsal root ganglion neurons. *Neuroscience* 89, 43-60. DOI:  
643 [https://doi.org/10.1016/s0306-4522\(98\)00443-6](https://doi.org/10.1016/s0306-4522(98)00443-6).
- 644 Abdulla, F. A. and Smith, P. A. (1999b). Neuropeptide Y actions and the distribution of Ca<sup>2+</sup>-dependent  
645 Cl<sup>-</sup> conductance in rat dorsal root ganglion neurons. *Journal of the Autonomic Nervous System* 78, 24-  
646 9. DOI: [https://doi.org/10.1016/s0165-1838\(99\)00058-2](https://doi.org/10.1016/s0165-1838(99)00058-2).
- 647 Abe, N., Borson, S. H., Gambello, M. J., Wang, F. and Cavalli, V. (2010). Mammalian target of rapamycin  
648 (mTOR) activation increases axonal growth capacity of injured peripheral nerves. *Journal of Biological*  
649 *Chemistry* 285, 28034-43. DOI: <https://doi.org/10.1074/jbc.M110.125336>.
- 650 Allen, Y., Adrian, T., Allen, J., Tatemoto, K., Crow, T., Bloom and Polak, J. (1983). Neuropeptide Y  
651 distribution in the rat brain. *Science* 221, 877-879. DOI: <https://doi.org/10.1126/science.6136091>.
- 652 Arcourt, A., Gorham, L., Dhandapani, R., Prato, V., Taberner, F. J., Wende, H., Gangadharan, V.,  
653 Birchmeier, C., Heppenstall, P. A. and Lechner, S. G. (2017). Touch receptor-derived sensory information  
654 alleviates acute pain signaling and fine-tunes nociceptive reflex coordination. *Neuron* 93, 179-193. DOI:  
655 <https://doi.org/10.1016/j.neuron.2016.11.027>.
- 656 Asante, C. O., Wallace, V. C. and Dickenson, A. H. (2010). Mammalian target of rapamycin signaling in  
657 the spinal cord is required for neuronal plasticity and behavioral hypersensitivity associated with  
658 neuropathy in the rat. *J Pain* 11, 1356-67. DOI: <https://doi.org/10.1016/j.jpain.2010.03.013>.
- 659 Brumovsky, P., Shi, T. S., Landry, M., Villar, M. J. and Hokfelt, T. (2007). Neuropeptide tyrosine and  
660 pain. *Trends in Pharmacological Sciences* 28, 93-102. DOI: <https://doi.org/10.1016/j.tips.2006.12.003>.
- 661 Brumovsky, P., Stanic, D., Shuster, S., Herzog, H., Villar, M. and Hokfelt, T. (2005). Neuropeptide Y2  
662 receptor protein is present in peptidergic and nonpeptidergic primary sensory neurons of the mouse.  
663 *Journal of Comparative Neurology* 489, 328-48. DOI: <https://doi.org/10.1002/cne.20639>.
- 664 Carlin, D., Golden, J. P., Mogha, A., Samineni, V. K., Monk, K. R., Gereau, R. W. T. and Cavalli, V.  
665 (2018). Deletion of Tsc2 in nociceptors reduces target innervation, ion channel expression, and sensitivity  
666 to heat. *eNeuro* 5. DOI: <https://doi.org/10.1523/ENEURO.0436-17.2018>.
- 667 Chen, W. T., Lu, N., Ding, Y., Wang, Y., Chan, L. T., Wang, X., Gao, X., Jiang, S. S. and Liu, K. (2016).  
668 Rapamycin-resistant mTOR activity is required for sensory axon regeneration induced by a conditioning  
669 lesion. *eNeuro* 3. DOI: <https://doi.org/10.1523/Eneuro.0358-16.2016>.
- 670 Colloca, L., Ludman, T., Bouhassira, D., Baron, R., Dickenson, A. H., Yarnitsky, D., Freeman, R., Truini,  
671 A., Attal, N., Finnerup, N. B., Eccleston, C., Kalso, E., Bennett, D. L., Dworkin, R. H. and Raja, S. N.  
672 (2017). Neuropathic pain. *Nature Reviews Disease Primers* 3, 17002. DOI:  
673 <https://doi.org/10.1038/nrdp.2017.2>.
- 674 Costigan, M., Scholz, J. and Woolf, C. J. (2009). Neuropathic pain: a maladaptive response of the nervous  
675 system to damage. *Annual Review of Neuroscience* 32, 1-32. DOI:  
676 <https://doi.org/10.1146/annurev.neuro.051508.135531>.

- 677 Cui, H., Cai, F. and Belsham, D. D. (2005). Anorexigenic hormones leptin, insulin, and alpha-  
678 melanocyte-stimulating hormone directly induce neurotensin (NT) gene expression in novel NT-  
679 expressing cell models. *The Journal of Neuroscience* 25, 9497-506. DOI:  
680 <https://doi.org/10.1523/JNEUROSCI.2269-05.2005>.
- 681 Decosterd, I. and Woolf, C. J. (2000). Spared nerve injury: an animal model of persistent peripheral  
682 neuropathic pain. *Pain* 87, 149-158. DOI: [https://doi.org/10.1016/s0304-3959\(00\)00276-1](https://doi.org/10.1016/s0304-3959(00)00276-1).
- 683 Diaz-Delcastillo, M., Woldbye, D. P. D. and Heegaard, A. M. (2018). Neuropeptide Y and its  
684 involvement in chronic pain. *Neuroscience* 387, 162-169. DOI:  
685 <https://doi.org/10.1016/j.neuroscience.2017.08.050>.
- 686 Dixon, W. J. (1965). The up-and-down method for small samples. *Journal of the American Statistical*  
687 *Association* 60, 967-978. DOI: <https://doi.org/Doi.10.2307/2283398>.
- 688 Geppetti, P., Veldhuis, N. A., Lieu, T. and Bunnett, N. W. (2015). G Protein-Coupled Receptors: dynamic  
689 machines for signaling pain and itch. *Neuron* 88, 635-49. DOI:  
690 <https://doi.org/10.1016/j.neuron.2015.11.001>.
- 691 Geranton, S. M., Jimenez-Diaz, L., Torsney, C., Tochiki, K. K., Stuart, S. A., Leith, J. L., Lumb, B. M.  
692 and Hunt, S. P. (2009). A rapamycin-sensitive signaling pathway is essential for the full expression of  
693 persistent pain states. *Journal of Neuroscience* 29, 15017-15027. DOI:  
694 <https://doi.org/10.1523/Jneurosci.3451-09.2009>.
- 695 Gu, N., Peng, J. Y., Murugan, M., Wang, X., Eyo, U. B., Sun, D. M., Ren, Y., Diccico-Bloom, E., Young,  
696 W., Dong, H. L. and Wu, L. J. (2016). Spinal microgliosis due to resident microglial proliferation is  
697 required for pain hypersensitivity after peripheral nerve injury. *Cell Reports* 16, 605-614. DOI:  
698 <https://doi.org/10.1016/j.celrep.2016.06.018>.
- 699 Guan, Z., Kuhn, J. A., Wang, X., Colquitt, B., Solorzano, C., Vaman, S., Guan, A. K., Evans-Reinsch, Z.,  
700 Braz, J., Devor, M., Abboud-Werner, S. L., Lanier, L. L., Lomvardas, S. and Basbaum, A. I. (2016).  
701 Injured sensory neuron-derived CSF1 induces microglial proliferation and DAPI2-dependent pain.  
702 *Nature Neuroscience* 19, 94-101. DOI: <https://doi.org/10.1038/nn.4189>.
- 703 Hu, Y., Mai, W., Chen, L., Cao, K., Zhang, B., Zhang, Z., Liu, Y., Lou, H., Duan, S. and Gao, Z. (2019).  
704 mTOR-mediated metabolic reprogramming shapes distinct microglia functions in response to  
705 lipopolysaccharide and ATP. *Glia*. DOI: <https://doi.org/10.1002/glia.23760>.
- 706 Inoue, K. and Tsuda, M. (2018). Microglia in neuropathic pain: cellular and molecular mechanisms and  
707 therapeutic potential. *Nature Reviews: Neuroscience* 19, 138-152. DOI:  
708 <https://doi.org/10.1038/nrn.2018.2>.
- 709 Khoutorsky, A., Bonin, R. P., Sorge, R. E., Gkogkas, C. G., Pawlowski, S. A., Jafarnejad, S. M., Pitcher,  
710 M. H., Alain, T., Perez-Sanchez, J., Salter, E. W., Martin, L., Ribeiro-Da-Silva, A., De Koninck, Y.,  
711 Cervero, F., Mogil, J. S. and Sonenberg, N. (2015). Translational control of nociception via 4E-binding  
712 protein 1. *eLife* 4. DOI: <https://doi.org/10.7554/eLife.12002>.
- 713 Khoutorsky, A. and Price, T. J. (2018). Translational control mechanisms in persistent pain. *Trends in*  
714 *Neurosciences* 41, 100-114. DOI: <https://doi.org/10.1016/j.tins.2017.11.006>.

- 715 Laplante, M. and Sabatini, D. M. (2012). mTOR signaling in growth control and disease. *Cell* 149, 274-  
716 93. DOI: <https://doi.org/10.1016/j.cell.2012.03.017>.
- 717 Laplante, M. and Sabatini, D. M. (2013). Regulation of mTORC1 and its impact on gene expression at a  
718 glance. *Journal of Cell Science* 126, 1713-9. DOI: <https://doi.org/10.1242/jcs.125773>.
- 719 Lisi, L., Aceto, P., Navarra, P. and Dello Russo, C. (2015). mTOR kinase: a possible pharmacological  
720 target in the management of chronic pain. *BioMed Research International* 2015, 394257. DOI:  
721 <https://doi.org/10.1155/2015/394257>.
- 722 Livak, K. J. and Schmittgen, T. D. (2001). Analysis of Relative Gene Expression Data Using Real-Time  
723 Quantitative PCR and the  $2^{-\Delta\Delta CT}$  Method. *Methods* 25, 402-408. DOI:  
724 <https://doi.org/10.1006/meth.2001.1262>.
- 725 Melemedjian, O. K., Asiedu, M. N., Tillu, D. V., Sanoja, R., Yan, J., Lark, A., Khoutorsky, A., Johnson,  
726 J., Peebles, K. A., Lepow, T., Sonenberg, N., Dussor, G. and Price, T. J. (2011). Targeting Adenosine  
727 Monophosphate-Activated Protein Kinase (AMPK) in preclinical models reveals a potential mechanism  
728 for the treatment of neuropathic pain. *Molecular Pain* 7, 1744-8069-7-70. DOI:  
729 <https://doi.org/10.1186/1744-8069-7-70>.
- 730 Melemedjian, O. K. and Khoutorsky, A. (2015). Translational control of chronic pain. *Progress in*  
731 *Molecular Biology and Translational Science* 131, 185-213. DOI:  
732 <https://doi.org/10.1016/bs.pmbts.2014.11.006>.
- 733 Melemedjian, O. K., Khoutorsky, A., Sorge, R. E., Yan, J., Asiedu, M. N., Valdez, A., Ghosh, S., Dussor,  
734 G., Mogil, J. S., Sonenberg, N. and Price, T. J. (2013). mTORC1 inhibition induces pain via IRS-1-  
735 dependent feedback activation of ERK. *Pain* 154, 1080-91. DOI:  
736 <https://doi.org/10.1016/j.pain.2013.03.021>.
- 737 Miyakawa, A., Furue, H., Katafuchi, T., Jiang, N., Yasaka, T., Kato, G. and Yoshimura, M. (2005). Action  
738 of neuropeptide Y on nociceptive transmission in substantia gelatinosa of the adult rat spinal dorsal horn.  
739 *Neuroscience* 134, 595-604. DOI: <https://doi.org/10.1016/j.neuroscience.2005.04.045>.
- 740 Muraoka, O., Xu, B., Tsurumaki, T., Akira, S., Yamaguchi, T. and Higuchi, H. (2003). Leptin-induced  
741 transactivation of NPY gene promoter mediated by JAK1, JAK2 and STAT3 in the neural cell lines.  
742 *Neurochemistry international* 42, 591-601. DOI: [https://doi.org/10.1016/s0197-0186\(02\)00160-2](https://doi.org/10.1016/s0197-0186(02)00160-2).
- 743 Nelson, T. S. and Taylor, B. K. (2021). Targeting spinal neuropeptide Y1 receptor-expressing  
744 interneurons to alleviate chronic pain and itch. *Progress in Neurobiology* 196, 101894. DOI:  
745 <https://doi.org/10.1016/j.pneurobio.2020.101894>.
- 746 Norsted Gregory, E., Codeluppi, S., Gregory, J. A., Steinauer, J. and Svensson, C. I. (2010). Mammalian  
747 target of rapamycin in spinal cord neurons mediates hypersensitivity induced by peripheral inflammation.  
748 *Neuroscience* 169, 1392-402. DOI: <https://doi.org/10.1016/j.neuroscience.2010.05.067>.
- 749 Obara, I., Tochiki, K. K., Geranton, S. M., Carr, F. B., Lumb, B. M., Liu, Q. and Hunt, S. P. (2011).  
750 Systemic inhibition of the mammalian target of rapamycin (mTOR) pathway reduces neuropathic pain  
751 in mice. *Pain* 152, 2582-95. DOI: <https://doi.org/10.1016/j.pain.2011.07.025>.
- 752 Parkhurst, C. N., Yang, G., Ninan, I., Savas, J. N., Yates, J. R., Lafaille, J. J., Hempstead, B. L., Littman,

- 753 D. R. and Gan, W. B. (2013). Microglia promote learning-dependent synapse formation through brain-  
754 derived neurotrophic factor. *Cell* 155, 1596-1609. DOI: <https://doi.org/10.1016/j.cell.2013.11.030>.
- 755 Peng, J., Gu, N., Zhou, L., U, B. E., Murugan, M., Gan, W. B. and Wu, L. J. (2016). Microglia and  
756 monocytes synergistically promote the transition from acute to chronic pain after nerve injury. *Nature*  
757 *Communications* 7, 12029. DOI: <https://doi.org/10.1038/ncomms12029>.
- 758 Price, T. J. and Géranton, S. M. (2009). Translating nociceptor sensitivity: the role of axonal protein  
759 synthesis in nociceptor physiology. *European Journal of Neuroscience* 29, 2253-2263. DOI:  
760 <https://doi.org/10.1111/j.1460-9568.2009.06786.x>.
- 761 Reinhold, A. K., Batti, L., Bilbao, D., Bunes, A., Rittner, H. L. and Heppenstall, P. A. (2015).  
762 Differential transcriptional profiling of damaged and intact adjacent dorsal root ganglia neurons in  
763 neuropathic pain. *PLoS One* 10, e0123342. DOI: <https://doi.org/10.1371/journal.pone.0123342>.
- 764 Risson, V., Mazelin, L., Roceri, M., Sanchez, H., Moncollin, V., Corneloup, C., Richard-Bulteau, H.,  
765 Vignaud, A., Baas, D., Defour, A., Freyssenet, D., Tanti, J. F., Le-Marchand-Brustel, Y., Ferrier, B.,  
766 Conjard-Duplany, A., Romanino, K., Bauche, S., Hantai, D., Mueller, M., Kozma, S. C., Thomas, G.,  
767 Ruegg, M. A., Ferry, A., Pende, M., Bigard, X., Koulmann, N., Schaeffer, L. and Gangloff, Y. G. (2009).  
768 Muscle inactivation of mTOR causes metabolic and dystrophin defects leading to severe myopathy.  
769 *Journal of Cell Biology* 187, 859-74. DOI: <https://doi.org/10.1083/jcb.200903131>.
- 770 Sapunar, D., Vukojevic, K., Kostic, S. and Puljak, L. (2011). Attenuation of pain-related behavior evoked  
771 by injury through blockade of neuropeptide Y Y2 receptor. *Pain* 152, 1173-1181. DOI:  
772 <https://doi.org/10.1016/j.pain.2011.01.045>.
- 773 Saxton, R. A. and Sabatini, D. M. (2017). mTOR signaling in growth, metabolism, and disease. *Cell* 169,  
774 361-371. DOI: <https://doi.org/10.1016/j.cell.2017.03.035>.
- 775 Solway, B., Bose, S. C., Corder, G., Donahue, R. R. and Taylor, B. K. (2011). Tonic inhibition of chronic  
776 pain by neuropeptide Y. *Proceedings of the National Academy of Sciences of the United States of*  
777 *America* 108, 7224-9. DOI: <https://doi.org/10.1073/pnas.1017719108>.
- 778 Taiwo, O. B. and Taylor, B. K. (2002). Antihyperalgesic effects of intrathecal neuropeptide Y during  
779 inflammation are mediated by Y1 receptors. *Pain* 96, 353-363. DOI: [https://doi.org/10.1016/s0304-](https://doi.org/10.1016/s0304-3959(01)00481-x)  
780 [3959\(01\)00481-x](https://doi.org/10.1016/s0304-3959(01)00481-x).
- 781 Tateda, S., Kanno, H., Ozawa, H., Sekiguchi, A., Yahata, K., Yamaya, S. and Itoi, E. (2017). Rapamycin  
782 suppresses microglial activation and reduces the development of neuropathic pain after spinal cord injury.  
783 *Journal of Orthopaedic Research* 35, 93-103. DOI: <https://doi.org/10.1002/jor.23328>.
- 784 Tracey, D. J., Romm, M. A. and Yao, N. N. (1995). Peripheral hyperalgesia in experimental neuropathy:  
785 exacerbation by neuropeptide Y. *Brain Research* 669, 245-54. DOI: [https://doi.org/10.1016/0006-](https://doi.org/10.1016/0006-8993(94)01265-J)  
786 [8993\(94\)01265-J](https://doi.org/10.1016/0006-8993(94)01265-J).
- 787 Van Hecke, O., Austin, S. K., Khan, R. A., Smith, B. H. and Torrance, N. (2014). Neuropathic pain in  
788 the general population: a systematic review of epidemiological studies. *Pain* 155, 654-62. DOI:  
789 <https://doi.org/10.1016/j.pain.2013.11.013>.
- 790 Wakisaka, S., Kajander, K. C. and Bennett, G. J. (1991). Increased neuropeptide Y (NPY)-like

- 791 immunoreactivity in rat sensory neurons following peripheral axotomy. *Neuroscience Letters* 124, 200-  
792 3. DOI: [https://doi.org/10.1016/0304-3940\(91\)90093-9](https://doi.org/10.1016/0304-3940(91)90093-9).
- 793 Wang, K., Wang, S., Chen, Y., Wu, D., Hu, X., Lu, Y., Wang, L., Bao, L., Li, C. and Zhang, X. (2021).  
794 Single-cell transcriptomic analysis of somatosensory neurons uncovers temporal development of  
795 neuropathic pain. *Cell Research*. DOI: <https://doi.org/10.1038/s41422-021-00479-9>.
- 796 Wiley, J. W., Gross, R. A. and Macdonald, R. L. (1993). Agonists for neuropeptide Y receptor subtypes  
797 NPY-1 and NPY-2 have opposite actions on rat nodose neuron calcium currents. *Journal of*  
798 *Neurophysiology* 70, 324-330. DOI: <https://doi.org/10.1152/jn.1993.70.1.324>.
- 799 Wu, S., Marie Lutz, B., Miao, X., Liang, L., Mo, K., Chang, Y. J., Du, P., Soteropoulos, P., Tian, B.,  
800 Kaufman, A. G., Bekker, A., Hu, Y. and Tao, Y. X. (2016). Dorsal root ganglion transcriptome analysis  
801 following peripheral nerve injury in mice. *Molecular Pain* 12. DOI:  
802 <https://doi.org/10.1177/1744806916629048>.
- 803 Xia, L.-P., Luo, H., Ma, Q., Xie, Y.-K., Li, W., Hu, H. and Xu, Z.-Z. (2021). GPR151 in nociceptors  
804 modulates neuropathic pain via regulating P2X3 function and microglial activation. *Brain*. DOI:  
805 <https://doi.org/10.1093/brain/awab245>.
- 806 Xiao, H. S., Huang, Q. H., Zhang, F. X., Bao, L., Lu, Y. J., Guo, C., Yang, L., Huang, W. J., Fu, G., Xu,  
807 S. H., Cheng, X. P., Yan, Q., Zhu, Z. D., Zhang, X., Chen, Z., Han, Z. G. and Zhang, X. (2002).  
808 Identification of gene expression profile of dorsal root ganglion in the rat peripheral axotomy model of  
809 neuropathic pain. *Proceedings of the National Academy of Sciences of the United States of America* 99,  
810 8360-5. DOI: <https://doi.org/10.1073/pnas.122231899>.
- 811 Xu, J. T., Zhao, J. Y., Zhao, X., Ligons, D., Tiwari, V., Atianjoh, F. E., Lee, C. Y., Liang, L., Zang, W.,  
812 Njoku, D., Raja, S. N., Yaster, M. and Tao, Y. X. (2014). Opioid receptor-triggered spinal mTORC1  
813 activation contributes to morphine tolerance and hyperalgesia. *Journal of Clinical Investigation* 124, 592-  
814 603. DOI: <https://doi.org/10.1172/JCI70236>.
- 815 Xu, Q., Fitzsimmons, B., Steinauer, J., O'Neill, A., Newton, A. C., Hua, X. Y. and Yaksh, T. L. (2011).  
816 Spinal phosphoinositide 3-kinase-Akt-mammalian target of rapamycin signaling cascades in  
817 inflammation-induced hyperalgesia. *Journal of Neuroscience* 31, 2113-24. DOI:  
818 <https://doi.org/10.1523/JNEUROSCI.2139-10.2011>.
- 819 Yousuf, M. S., Shiers, S. I., Sahn, J. J., Price, T. J. and Dantzer, R. (2020). Pharmacological Manipulation  
820 of Translation as a Therapeutic Target for Chronic Pain. *Pharmacological Reviews* 73, 59-88. DOI:  
821 <https://doi.org/10.1124/pharmrev.120.000030>.
- 822 Yu, X., Liu, H., Hamel, K. A., Morvan, M. G., Yu, S., Leff, J., Guan, Z., Braz, J. M. and Basbaum, A. I.  
823 (2020). Dorsal root ganglion macrophages contribute to both the initiation and persistence of neuropathic  
824 pain. *Nature Communications* 11, 264. DOI: <https://doi.org/10.1038/s41467-019-13839-2>.
- 825 Zhang, W., Sun, X.-F., Bo, J.-H., Zhang, J., Liu, X.-J., Wu, L.-P., Ma, Z.-L. and Gu, X.-P. (2013).  
826 Activation of mTOR in the spinal cord is required for pain hypersensitivity induced by chronic  
827 constriction injury in mice. *Pharmacology Biochemistry and Behavior* 111, 64-70. DOI:  
828 <https://doi.org/10.1016/j.pbb.2013.07.017>.
- 829 Zhao, J. Y., Liang, L., Gu, X., Li, Z., Wu, S., Sun, L., Atianjoh, F. E., Feng, J., Mo, K., Jia, S., Lutz, B.



830 M., Bekker, A., Nestler, E. J. and Tao, Y. X. (2017). DNA methyltransferase DNMT3a contributes to  
831 neuropathic pain by repressing *Kcna2* in primary afferent neurons. *Nature Communications* 8, 14712.  
832 DOI: <https://doi.org/10.1038/ncomms14712>.

833

834

835 **Figure and figure legends**

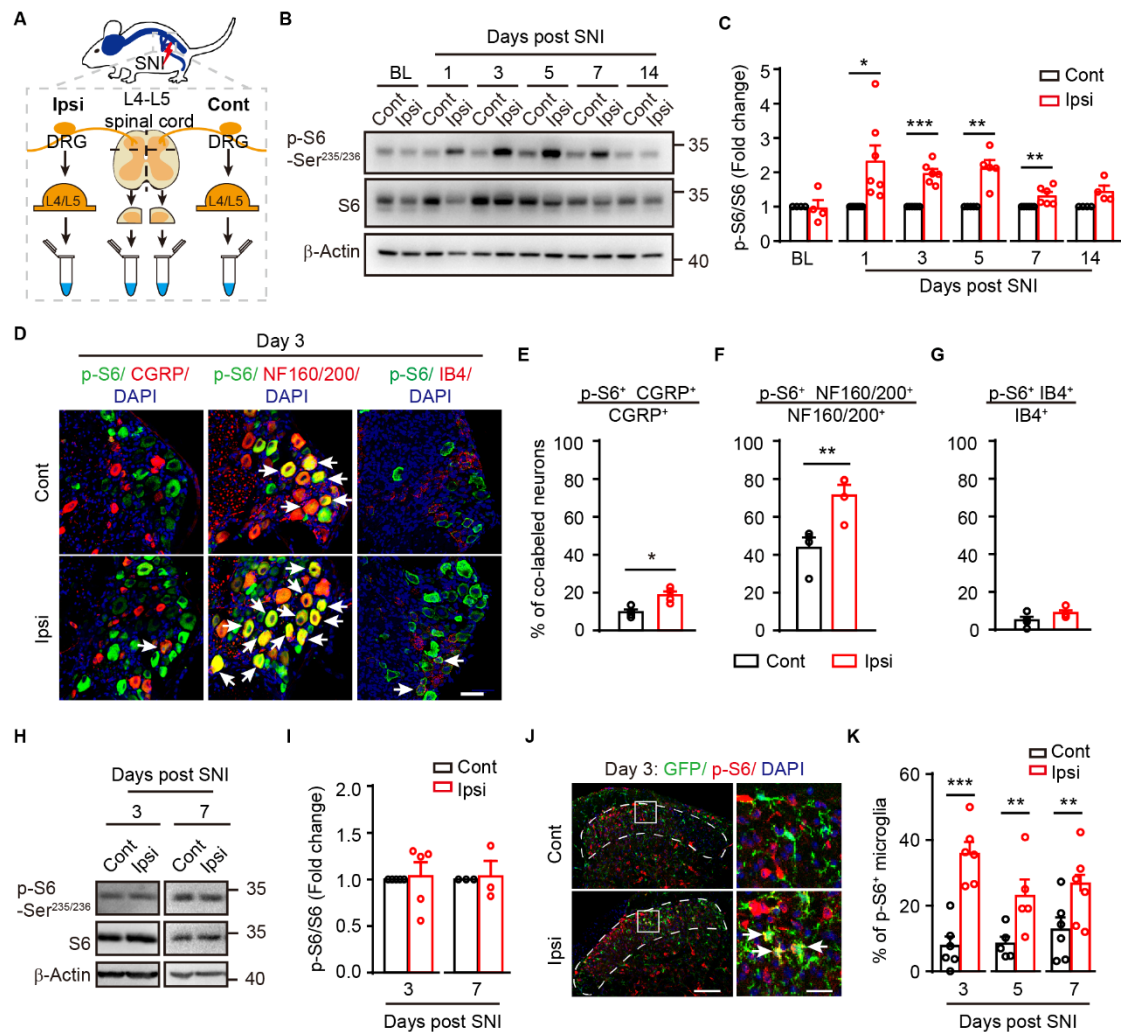

836

837 **Figure 1. Activation of the mTOR in subsets of DRG neurons and SDH microglia**  
 838 **after spared nerve injury (SNI).**

839 **(A)** A schematic diagram depicting the isolation of DRGs and SDH.

840 **(B)** Representative blots indicating the upregulated phosphor-S6 (p-S6) levels in the  
 841 ipsilateral DRGs after SNI.

842 **(C)** Quantification of p-S6/S6 in ipsilateral DRG at indicated time points after SNI ( $n$   
 843 = 4-7 mice per time point).

844 **(D)** Co-immunostaining p-S6 with CGRP, NF160/200 or IB4 in DRGs after SNI  
 845 (arrows indicating co-labeled neurons). Scale bar, 50  $\mu$ m.

846 **(E-G)** Quantification of p-S6<sup>+</sup> neurons in different subpopulations of DRG neurons:  
 847 CGRP **(E)**, NF160/200 **(F)**, and IB4 **(G)** ( $n = 4$  mice).

848 **(H)** Representative blots of p-S6 and S6 levels in SDH (L4-L5) at day 3 and day 7 after  
 849 SNI.

850 **(I)** Quantification of p-S6/S6 in ipsilateral and contralateral SDH ( $n = 5$  and 3 for day  
 851 3 and day 7 post SNI respectively).

852 **(J)** Representative images of p-S6<sup>+</sup> microglia (arrows) in superficial contralateral and  
853 ipsilateral SDH (dotted lines) at indicated time points after SNI. Boxes show regions of  
854 higher magnification in the SDH. Scale bar, 100 μm for low magnification images and  
855 20 μm for high magnification images.

856 **(K)** Quantification of p-S6<sup>+</sup> microglia in superficial SDH ( $n = 5-6$  mice per time point).  
857 Values are means  $\pm$  SEM. \*  $p < 0.05$ , \*\*  $p < 0.01$ , and \*\*\*  $p < 0.001$ , paired student t-tests.  
858 BL, baseline; Ipsi, ipsilateral; Cont, contralateral; DRG: dorsal root ganglion; SDH,  
859 spinal dorsal horn.

860 **Figure 1-source data 1.** Raw data of quantification of p-S6/S6 blots, p-S6<sup>+</sup> neurons, p-  
861 S6<sup>+</sup> microglia in DRG and SDH.

862 **Figure 1-source data 2.** Original pictures of the western blots presented in (B) and (H).

863 **Figure 1-figure supplement 1.** Characterizing of p-S6 staining with different markers  
864 in DRG or SDH after SNI.

865

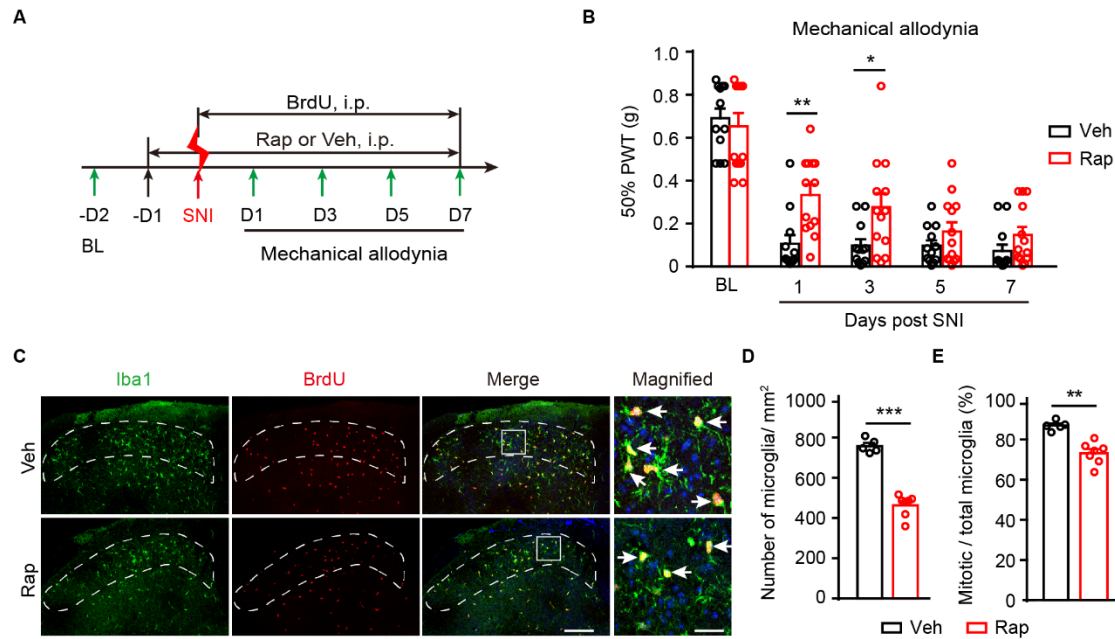

866

867 **Figure 2. Rapamycin treatments inhibit mTOR activation and attenuates**  
 868 **mechanical allodynia after SNI.**

869 (A) Experimental schedule for rapamycin or vehicle administration through  
 870 intraperitoneal (i.p.) injection.

871 (B) Measurements of mechanical allodynia with daily i.p. injection of rapamycin or  
 872 vehicle after SNI ( $n = 12-13$  per group).

873 (C) Representative images of Iba1 and BrdU immunolabeling in ipsilateral superficial  
 874 SDH (dotted regions) at day 7 after SNI. Boxes show regions of higher magnification  
 875 in SDH, while arrows indicate Iba1<sup>+</sup> BrdU<sup>+</sup> mitotic microglia. Scale bars, 100  $\mu\text{m}$  for  
 876 low magnification images and 20  $\mu\text{m}$  for high magnification images.

877 (D-E) Quantitative analysis of microglia per square millimeter (D) and the percentage  
 878 of mitotic microglia in total microglia (E) in ipsilateral SDH at day 7 after SNI ( $n = 5-7$   
 879 mice per group).

880 Values are means  $\pm$  SEM. \*  $p < 0.05$ , \*\*  $p < 0.01$ , \*\*\*  $p < 0.001$ , two-way ANOVA  
 881 followed by Bonferroni's *post hoc* tests among group (B), or unpaired student t-tests  
 882 (D, E). Rap, rapamycin; Veh, vehicle; BL, baseline; D, day; SDH, spinal dorsal horn;  
 883 PWT, paw withdraw threshold.

884 **Figure 2-source data 1.** Raw data of measurements of mechanical allodynia, number  
 885 of microglia per square millimeter, and the percentage of mitotic microglia in total  
 886 microglia.

887 **Figure 2-figure supplement 1.** Administration of rapamycin suppresses mTOR  
 888 activation.

889

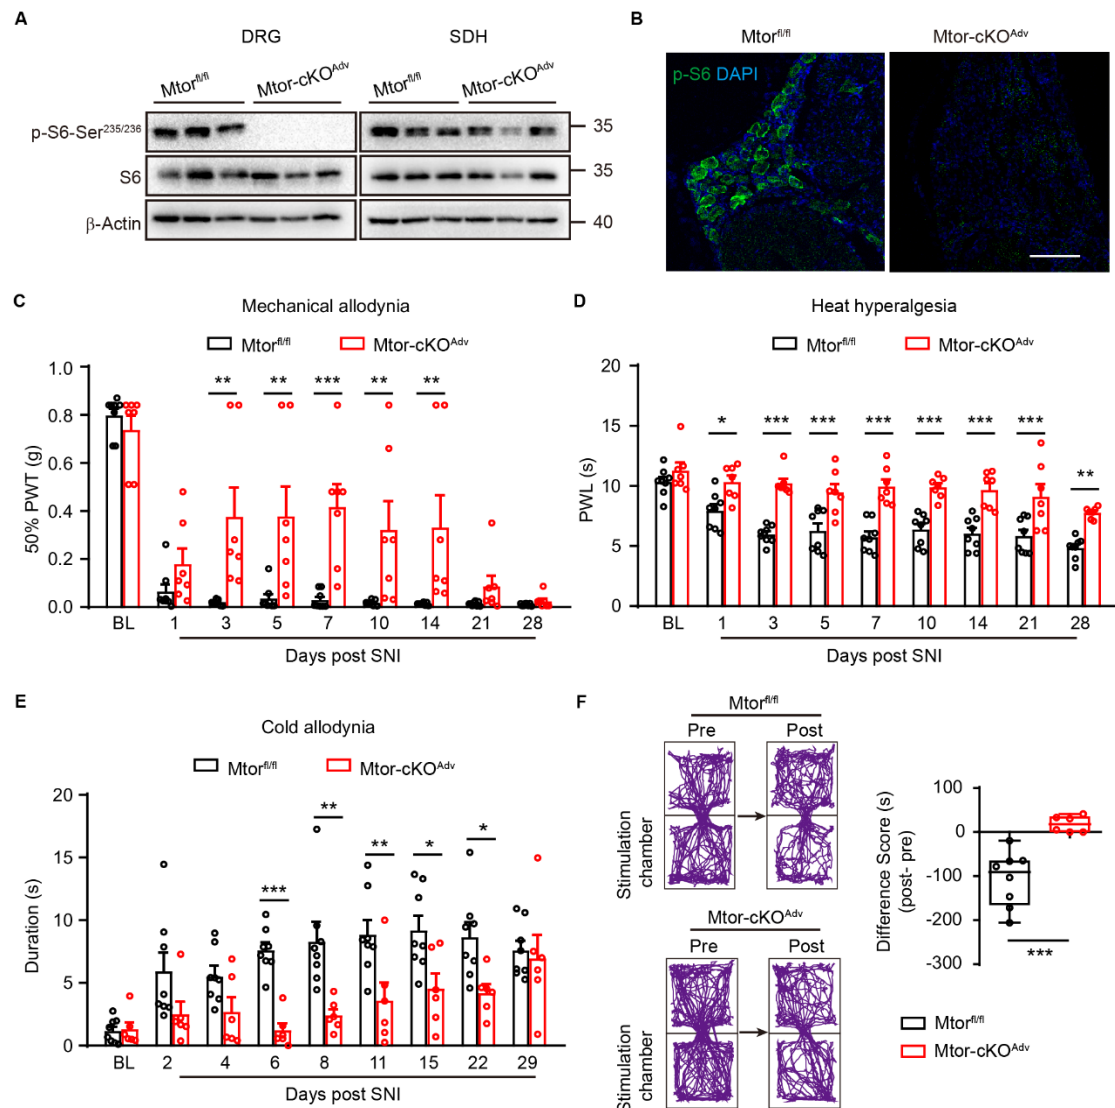

890

891 **Figure 3. Ablation of *Mtor* in DRG neurons alleviates neuropathic pain.**

892 (A) Representative blots of p-S6 and S6 in ipsilateral DRG and SDH from *Mtor<sup>fl/fl</sup>* and  
893 *Mtor-cKO<sup>Adv</sup>* mice at day 7 after SNI.

894 (B) Representative images of p-S6 in ipsilateral DRG at day 7 after SNI, indicating the  
895 ablation of mTOR in *Mtor-cKO<sup>Adv</sup>* mice rather than *Mtor<sup>fl/fl</sup>* mice after SNI. Scale bar,  
896 100  $\mu$ m.

897 (C-E) Measurements of mechanical allodynia (C), heat hyperalgesia (D), and cold  
898 allodynia (E) in *Mtor<sup>fl/fl</sup>* and *Mtor-cKO<sup>Adv</sup>* mice before and after SNI ( $n = 6-8$  mice per  
899 group).

900 (F) Track plots of animal movements at pre- and post-conditioning phase with a two-  
901 chamber conditioned place aversion (CPA) test ( $n = 6-8$  mice per group) in *Mtor<sup>fl/fl</sup>* and  
902 *Mtor-cKO<sup>Adv</sup>* mice at day 15 after SNI. Difference scores = post-conditioning time (post)  
903 - pre-conditioning (pre) time spent in the stimulation chamber.

904 Values are means  $\pm$  SEM. \*  $p < 0.05$ , \*\*  $p < 0.01$ , \*\*\*  $p < 0.001$ , two-way ANOVA  
905 followed by Bonferroni's *post hoc* tests among groups (C-E), or unpaired student t-tests  
906 (F). BL, baseline, PWT, paw withdraw threshold; PWL, paw withdraw latency.

907 **Figure 3-source data 1.** Raw data of measurements of mechanical allodynia, heat  
908 hyperalgesia, cold allodynia, and CPA tests.

909 **Figure 3-source data 2.** Original pictures of the western blots presented in (A).

910 **Figure 3-figure supplement 1.** Sensory functions and motor activities are comparable

911 in *Mtor<sup>fl/fl</sup>* and *Mtor-cKO<sup>Adv</sup>* mice at basal state.

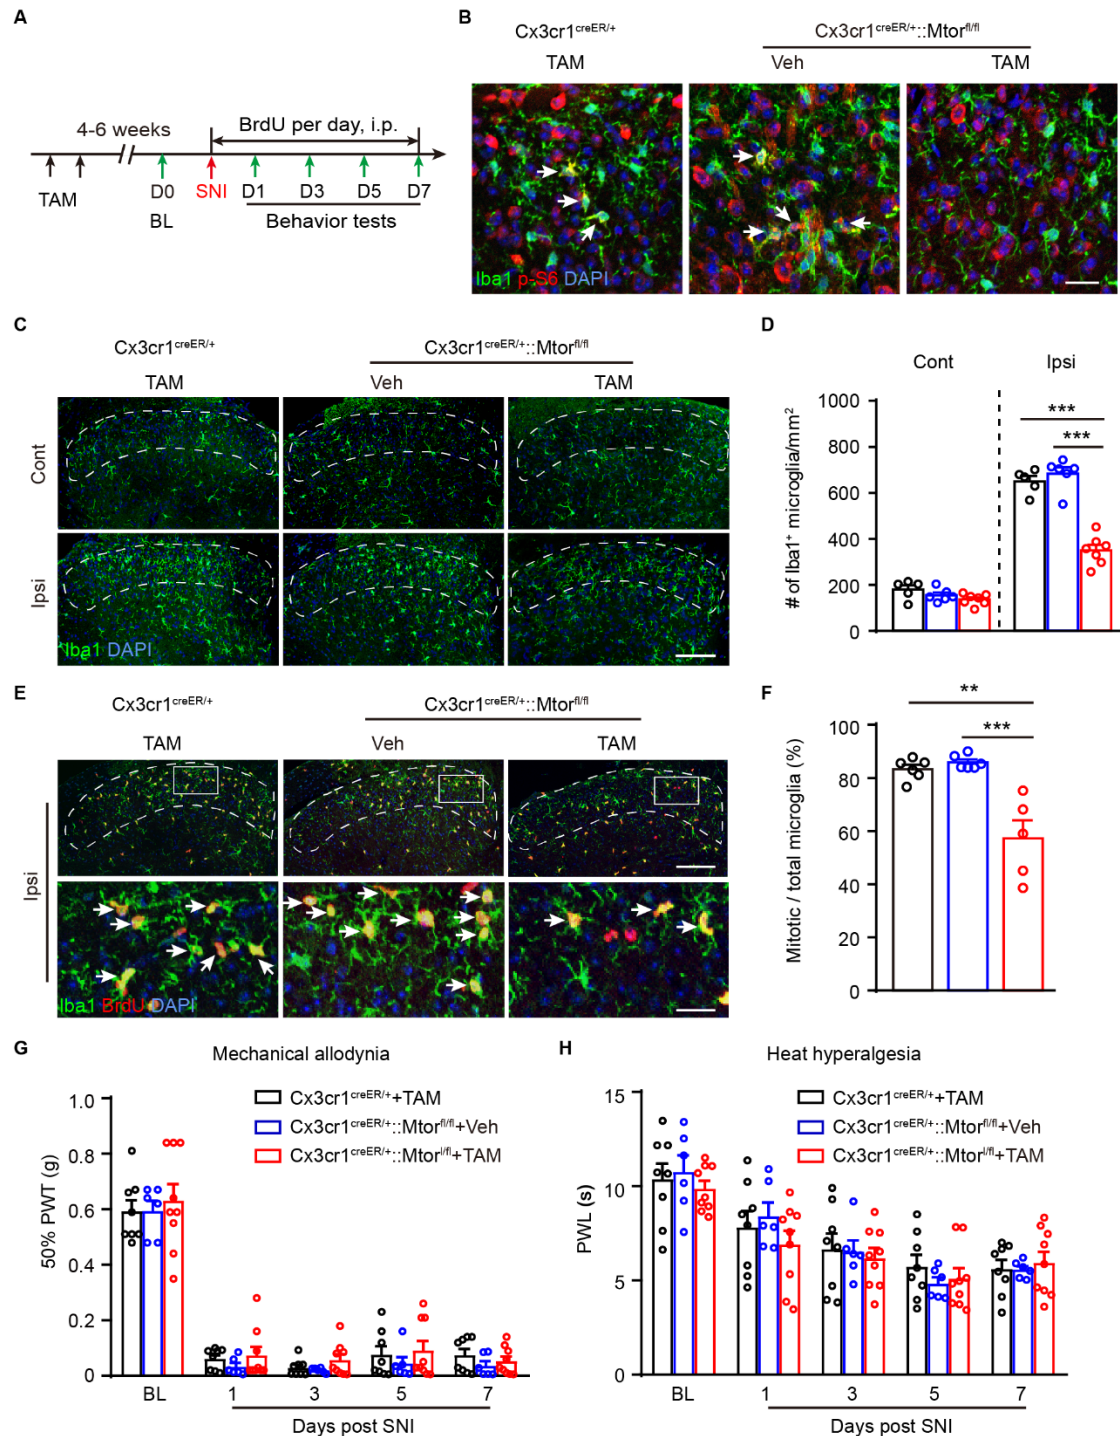

912

913 **Figure 4. Ablation of *Mtor* in microglia reduces microgliosis, but does not affect**  
 914 **neuropathic pain.**

915 (A) Experimental schedule showing the selected *Mtor* deletion in microglia and pain  
 916 tests.

917 (B) Representative images showing immunofluorescence labeling of Iba1 and p-S6 in  
 918 ipsilateral SDH at day 7 post SNI in *Cx3cr1*<sup>CreER/+</sup>::*Mtor*<sup>fl/fl</sup> or control mice  
 919 (*Cx3cr1*<sup>CreER/+</sup> mice with TAM and *Cx3cr1*<sup>CreER/+</sup>::*Mtor*<sup>fl/fl</sup> mice with Veh). Arrows  
 920 indicating Iba1<sup>+</sup> p-S6<sup>+</sup> microglia. Scale bar, 20 μm.

921 (C) Representative images of bilateral SDH microglia (Iba1<sup>+</sup>) in *Cx3cr1*<sup>CreER/+</sup>::*Mtor*<sup>fl/fl</sup>

922 mice with TAM or in control mice at day 7 after SNI. Scale bar, 100  $\mu$ m.  
923 **(D)** Quantification of microglia in ipsilateral and contralateral in *Cx3cr1<sup>CreER/+</sup>::Mtor<sup>fl/fl</sup>*  
924 and control mice at day 7 post SNI ( $n = 5-7$  per group).  
925 **(E)** Representative images of ipsilateral SDH showing co-localization of Iba1 and BrdU  
926 (arrows) at day 7 after SNI. Boxes show regions of higher magnification in the SDH.  
927 Scale bar, 100  $\mu$ m for low magnification images and 20  $\mu$ m for high magnification  
928 images.  
929 **(F)** Quantitation of mitotic microglia (Iba1<sup>+</sup> BrdU<sup>+</sup>) in SDH in *Cx3cr1<sup>CreER/+</sup>::Mtor<sup>fl/fl</sup>*  
930 and control mice at day 7 after SNI ( $n = 5-7$  mice per group).  
931 **(G-H)** Measurements of mechanical allodynia **(G)** and heat hyperalgesia **(H)** in  
932 *Cx3cr1<sup>CreER/+</sup>::Mtor<sup>fl/fl</sup>* and control mice before and after SNI ( $n = 6-9$  mice per group).  
933 Values are means  $\pm$  SEM. \*\*  $p < 0.01$ , and \*\*\*  $p < 0.001$ , one-way AVOVA **(F)** or two-  
934 way ANOVA followed by Bonferroni's *post hoc* tests among groups **(D, G, H)**. TAM,  
935 tamoxifen; Veh, vehicle; Cont, contralateral; Ipsi, ipsilateral; PWT, paw withdraw  
936 threshold; PWL, paw withdraw latency; D, day.  
937 **Figure 4-source data 1.** Raw data of quantification of microglia, mitotic microglia,  
938 mechanical allodynia, and heat hyperalgesia.  
939 **Figure 4-figure supplement 1.** Stratagem for generating *Mtor-cKO<sup>MG</sup>* mice.



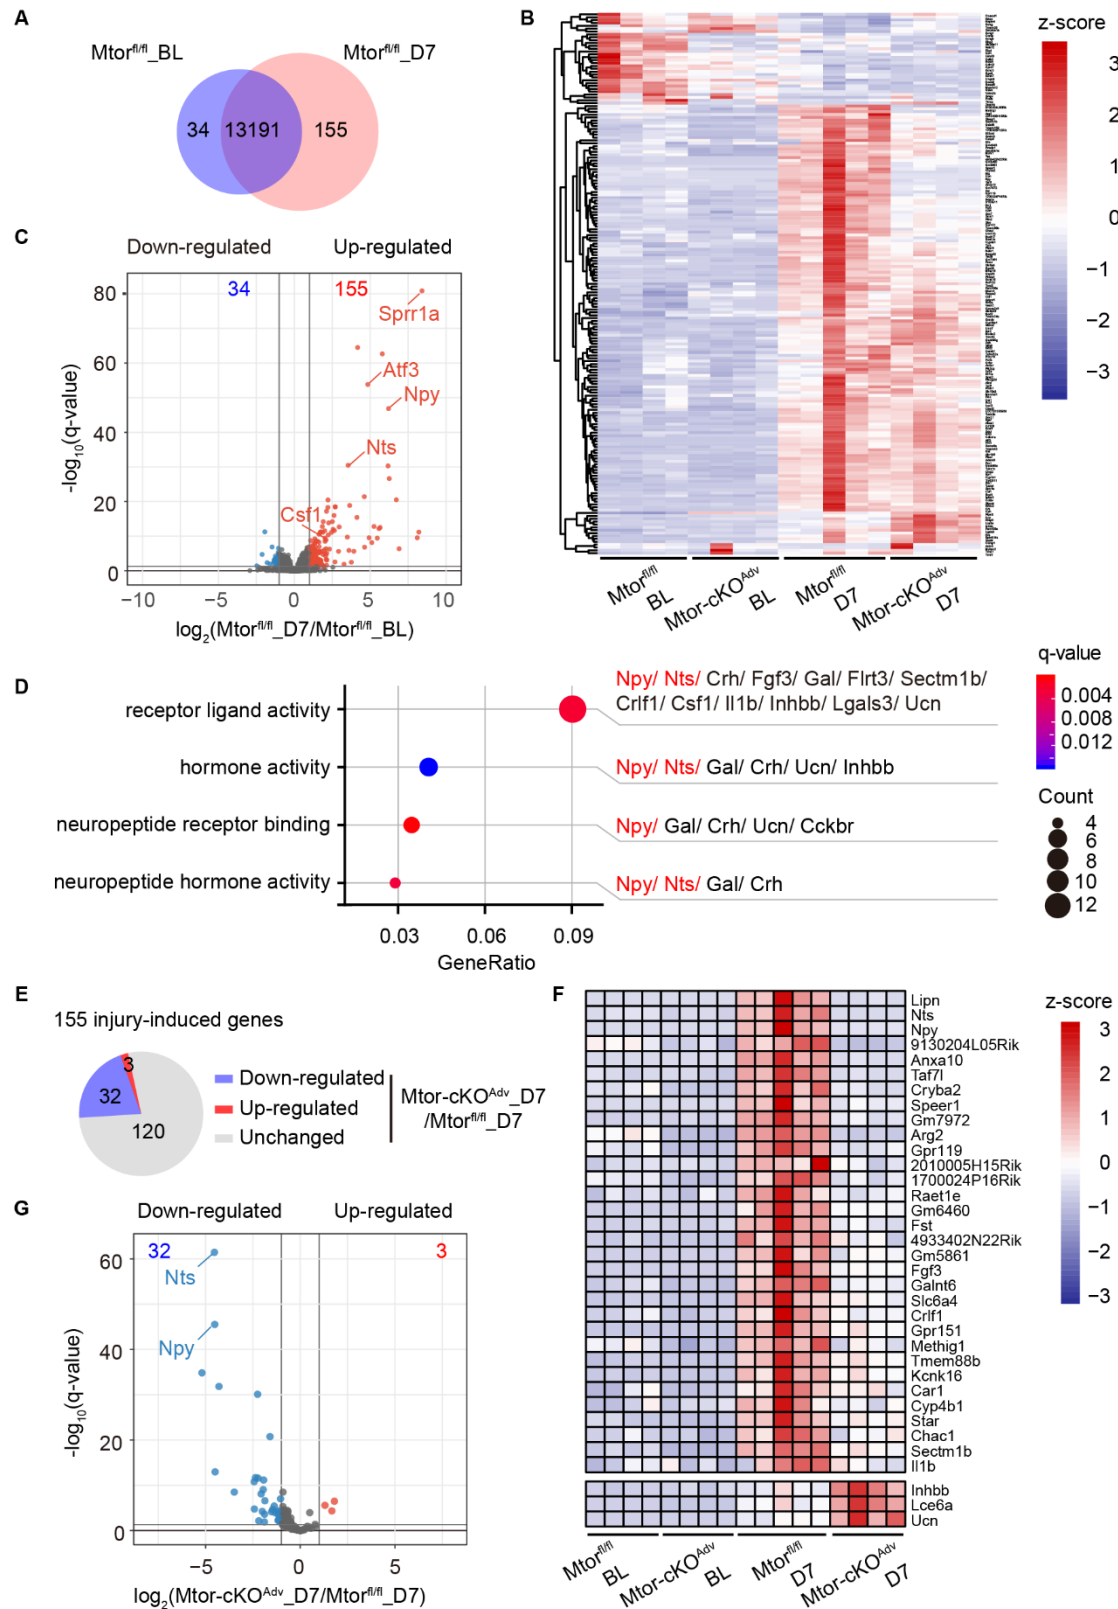

940

941 **Figure 5. Ablation of *Mtor* in DRG neurons suppressed elevation of nerve injury-**  
 942 **induced genes.**

943 (A) Venn diagram of DEGs identified in DRG before and after SNI (day 7) in *Mtor*<sup>fl/fl</sup>  
 944 mice (155 upregulated and 34 downregulated).

945 (B) Heat map of 189 DEGs by hierarchical clustering using z-score values ( $n = 4-5$   
946 mice per group).

947 (C) Volcano plot of DRG transcripts before and after SNI (day 7) in *Mtor<sup>fl/fl</sup>* mice. Red  
948 dots indicate 155 upregulated genes and blue dots indicate 34 downregulated genes  
949 after SNI.

950 (D) GO analysis of 155 upregulated genes after SNI and regroup into molecular  
951 function terms. All genes in each term are listed.

952 (E) Pie chart of 155 injury-induced genes with 32 downregulated and 3 upregulated in  
953 *Mtor-cKO<sup>Adv</sup>* mice after SNI.

954 (F) Heat map of 35 DEGs in all samples using Z-score values. Only 3 (*Inhbb*, *Lce6a*  
955 and *Ucn*) of the 155 injury-induced genes are upregulated upon deletion of *Mtor* in  
956 DRG neurons.

957 (G) Volcano plot of 35 DEGs in control and *Mtor-cKO<sup>Adv</sup>* mice after SNI. Red dots  
958 indicate 3 upregulated genes and blue dots indicate 32 downregulated genes after  
959 mTOR ablation.

960 BL, baseline; D, day; DEGs, differentially expressed genes.

961 **Figure 5-source data 1.** FPKMs of differentially expressed genes (189 genes) used to  
962 generate Figure B.

963 **Figure 5- source data 2.** FPKMs of differentially expressed genes (35 genes) upon  
964 *Mtor* ablation used to generate Figure F.

965 **Figure 5-figure supplement 1.** Quantitative RT-PCR of downregulated DEGs  
966 identified in RNA sequencing.

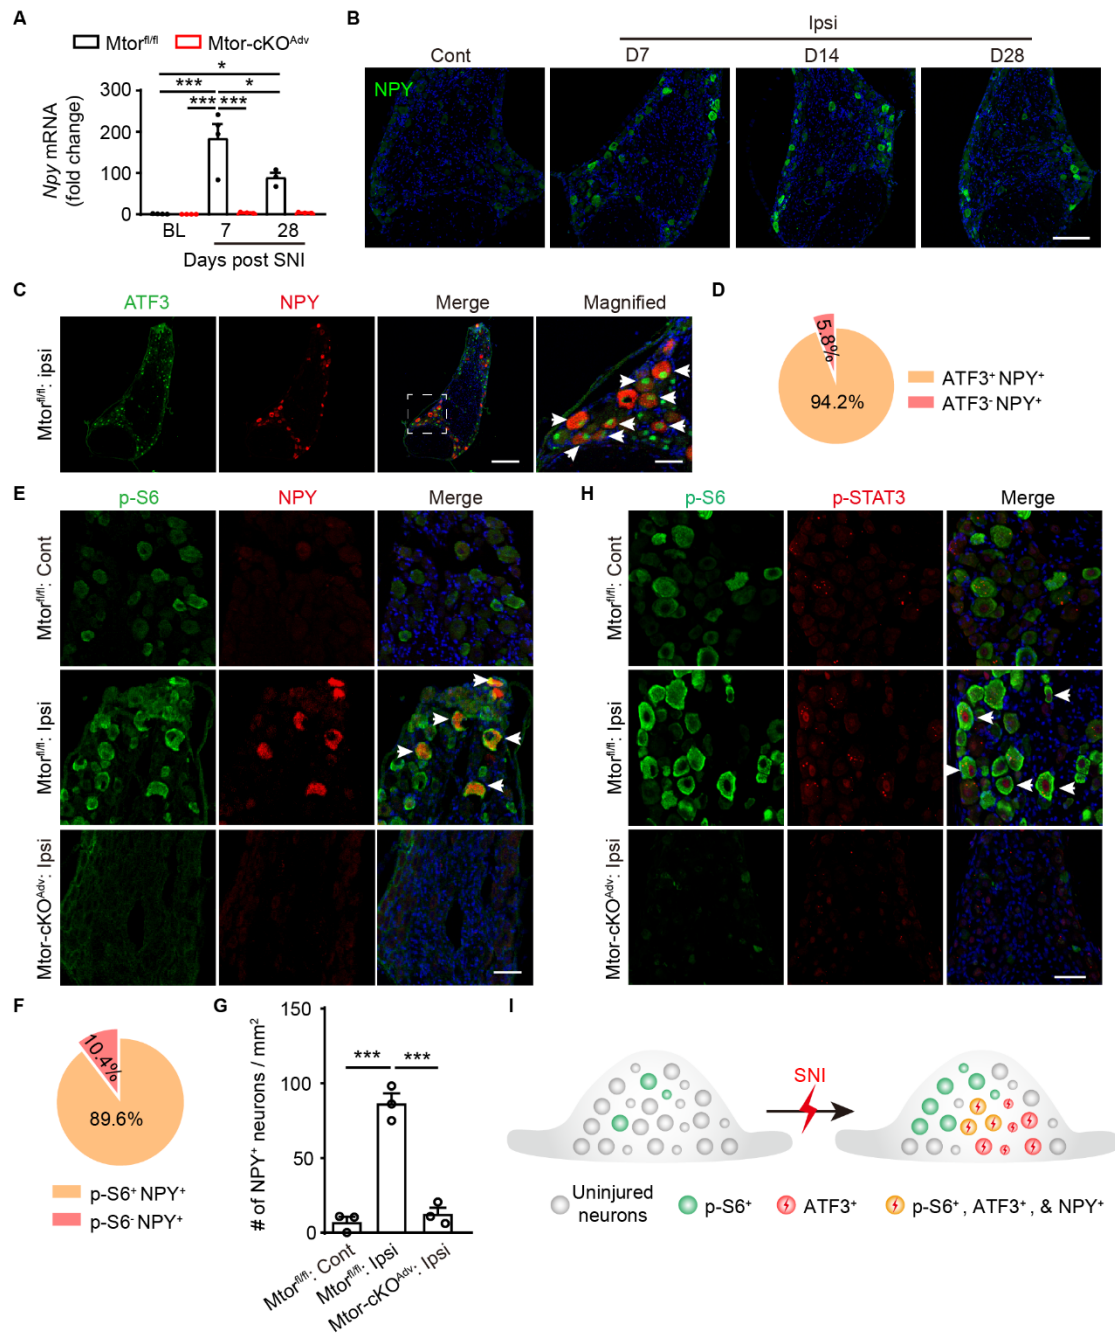

967

968

969

**Figure 6. Activation of mTOR is required for NPY induction in DRG neurons after SNI.**

970

(A) Quantitative RT-PCR of *Npy* transcripts in the ipsilateral DRG from both *Mtor<sup>fl/fl</sup>* and *Mtor-cKO<sup>Adv</sup>* mice at indicated time points after SNI ( $n = 3-4$  mice per time point).

971

(B) Representative images of NPY staining in DRG from *Mtor<sup>fl/fl</sup>* mice at indicated times. Scale bars, 100  $\mu$ m.

972

(C) Representative images of ATF3 and NPY staining in the ipsilateral DRG from *Mtor<sup>fl/fl</sup>* mice at day 7 after SNI. Arrows indicate ATF3<sup>+</sup> NPY<sup>+</sup> neurons. Dotted boxes show regions of higher magnification in the DRG. Scale bars, 200  $\mu$ m for low magnification images and 50  $\mu$ m for high magnification images.

973

(D) A pie chart showing the ratio of NPY<sup>+</sup> in total ATF3<sup>+</sup> neurons in the ipsilateral DRG

974

979 from *Mtor<sup>fl/fl</sup>* mice at day 7 after SNI.

980 **(E)** Representative images of NPY and p-S6 staining in contralateral or ipsilateral DRG  
981 at day 7 after SNI in *Mtor<sup>fl/fl</sup>* and *Mtor-cKO<sup>Adv</sup>* mice. Arrows indicate co-labeled neurons.  
982 Dotted boxes show regions of higher magnification in the DRG. Scale bar, 50  $\mu$ m.

983 **(F)** A pie chart indicating the ratio of NPY<sup>+</sup> neurons in all p-S6<sup>+</sup> neurons in ipsilateral  
984 DRG from *Mtor<sup>fl/fl</sup>* mice at day 7 after SNI.

985 **(G)** Quantification of NPY<sup>+</sup> neurons in *Mtor<sup>fl/fl</sup>* and *Mtor-cKO<sup>Adv</sup>* mice at day 7 after  
986 SNI ( $n = 3$  mice per group).

987 **(H)** Representative images of p-S6 and p-STAT3 staining in contralateral or ipsilateral  
988 DRG at day 3 after SNI in *mTOR<sup>fl/fl</sup>* and *Mtor-cKO<sup>Adv</sup>* mice. Scale bar, 50  $\mu$ m.

989 **(I)** Schematic diagram demonstrating that NPY is selectively induced in p-S6<sup>+</sup> and  
990 ATF3<sup>+</sup> injured neurons in ipsilateral DRG.

991 Values are means  $\pm$  SEM. \*  $p < 0.05$ , and \*\*\*  $p < 0.001$ , one-way ANOVA followed by  
992 Bonferroni's *post hoc* tests among groups. Cont, contralateral; Ipsi, ipsilateral.

993 **Figure 6-source data 1.** Raw data of *Npy* transcripts and number of NPY<sup>+</sup> neurons.

994 **Figure 6-figure supplement 1.** NPY was expressed in large-sized mechanoreceptors.

995

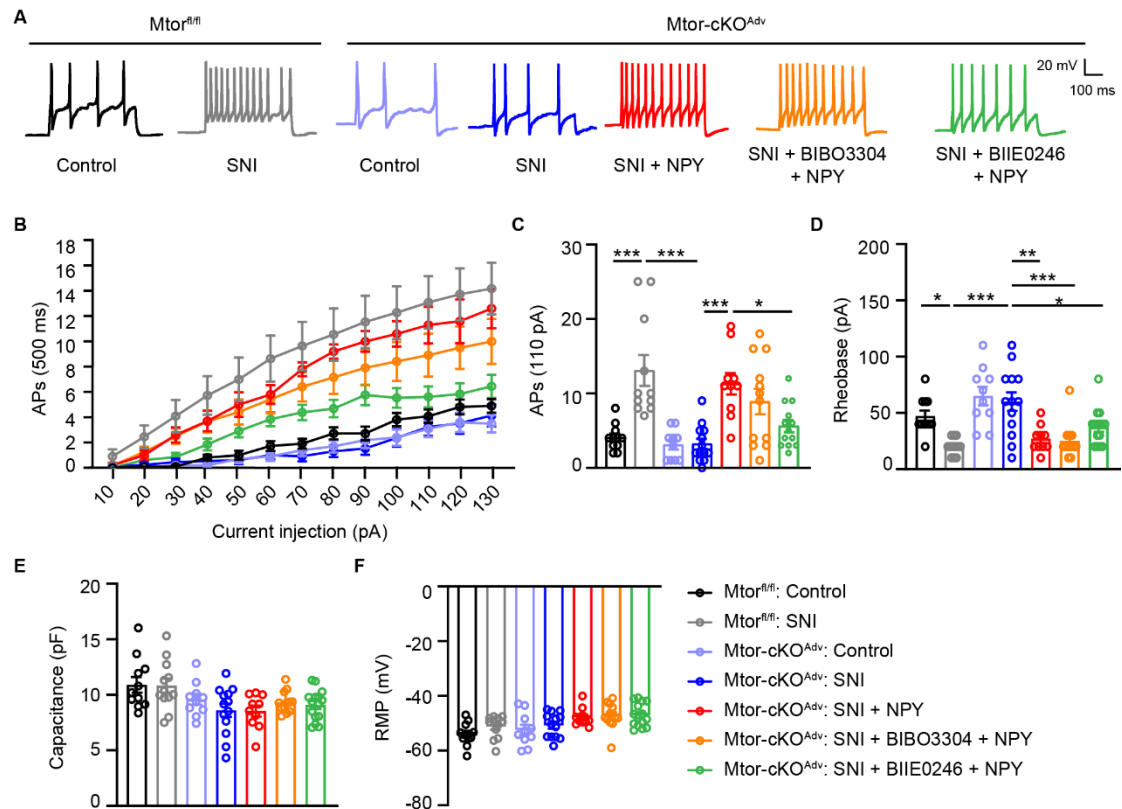

996

997

**Figure 7. NPY enhances nociceptor excitability through Y2R.**

998 (A) Representative AP traces elicited by intracellular injection of 110 pA depolarizing  
 999 currents on dissociated DRG neurons from resting membrane potentials (RMP) in  
 1000 *Mtor<sup>fl/fl</sup>* mice and *Mtor-cKO<sup>Adv</sup>* mice with or without SNI. NPY (300 nM), BIBO3304  
 1001 (1 μM) and BIIE0246 (1 μM) are replenished in medium as indicated.

1002 (B) The response of *Mtor<sup>fl/fl</sup>* and *Mtor-cKO<sup>Adv</sup>* DRG neurons across a series of 500 ms  
 1003 depolarizing current pulses in 10 pA increment from 0 pA to 130 pA, in the presence  
 1004 or absence of NPY, BIBO3304 or BIIE0246 ( $n = 10-13$  neurons per group).

1005 (C) Quantification of APs evoked by input current at 110 pA ( $n = 10-13$  neurons per  
 1006 group).

1007 (D) Averaged values of rheobase currents in DRG neurons among groups measured in  
 1008 I-clamp ( $n = 10-13$  neurons per group).

1009 (E-F) Quantification of membrane capacitance (E) and RMP (F) among groups ( $n =$   
 1010  $10-13$  neurons per group). BIBO3304, Y1R antagonist; BIIE0246, Y2R antagonist.

1011 Values are means  $\pm$  SEM. \*  $p < 0.05$ , \*\*  $p < 0.01$ , and \*\*\*  $p < 0.001$ , one-way ANOVA  
 1012 followed by Bonferroni's *post hoc* tests among groups. AP, action potential; RMP,  
 1013 resting membrane potentials.

1014 **Figure 7-source data 1.** Raw data of APs, rheobase currents, membrane capacitance,  
 1015 and RMP.

1016 **Figure 7-figure supplement 1.** Distinct expression pattern of NPY (\*) and Y2R  
 1017 (arrows) by immunofluorescence analysis.

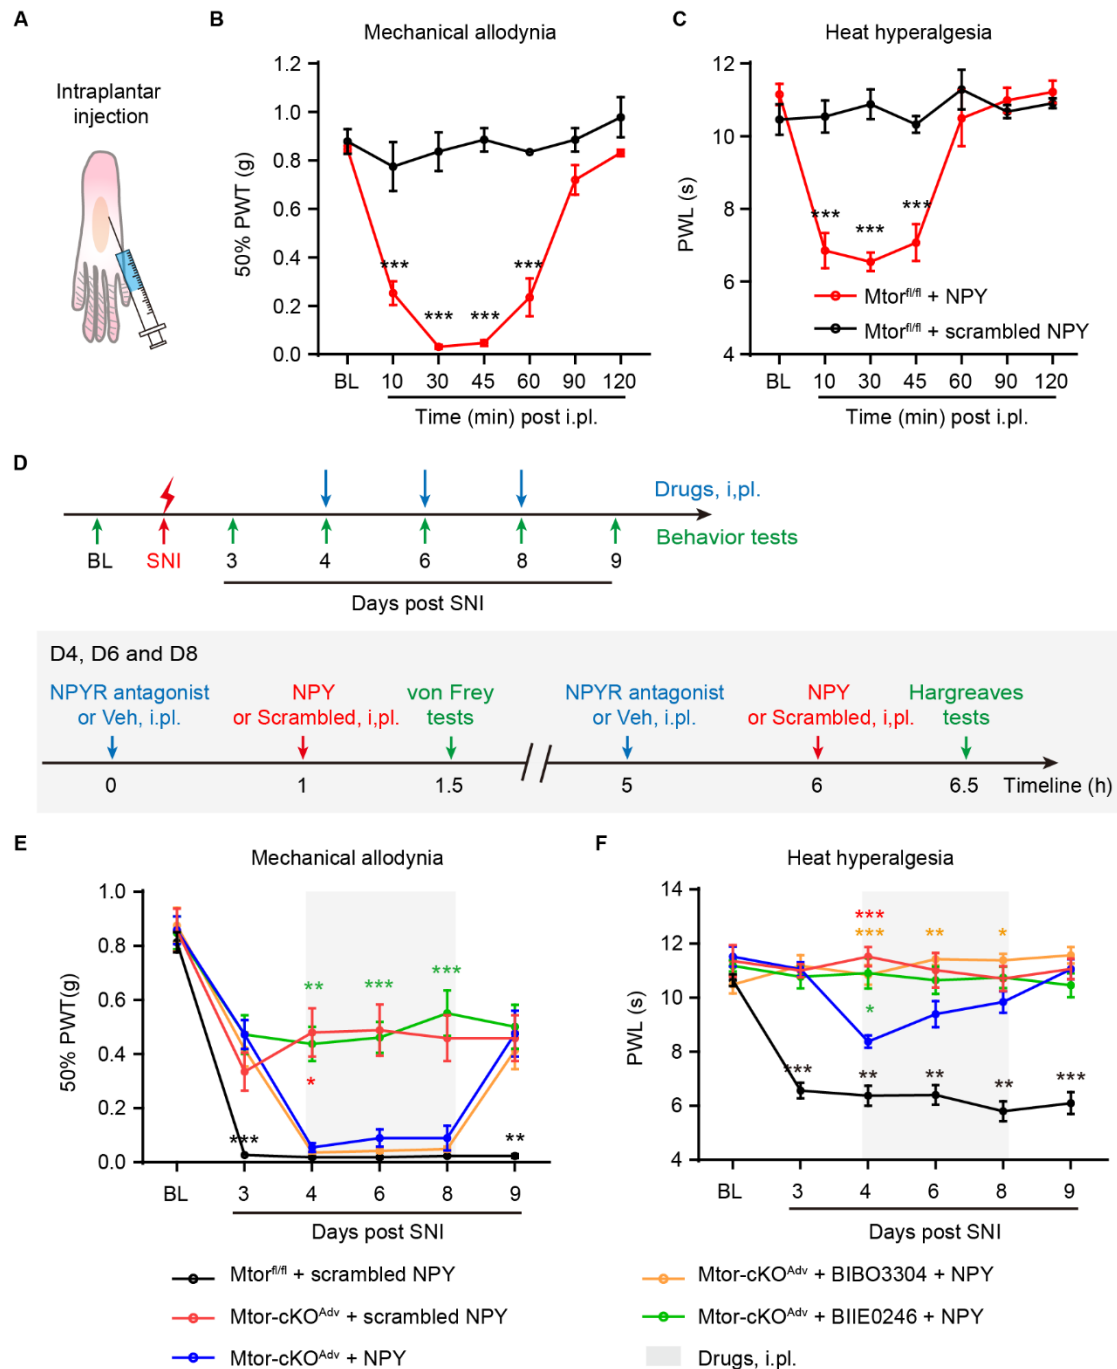

**Figure 8. Intraplantar injection of NPY reversed analgesic effects of *Mtor* ablation through Y2R.**

(A) Schematic diagram indicating intraplantar (i.pl.) injection.

(B-C) NPY (0.2 nmol) i.pl. injection into normal *Mtor<sup>fl/fl</sup>* mice hind paw leads to transient mechanical allodynia (B) and heat hyperalgesia (C) within an hour ( $n = 4$  mice per group).

(D) Experimental schedule showing the timeline of i.pl. injection of drugs (including NPY, NPYR antagonist and vehicle) and behavior tests. Behavior tests were measured before and after SNI as indicated. Drugs were injected at day 4, 6 and 8.

(E-F) Measurement of mechanical allodynia (E) and heat hyperalgesia (F) in *Mtor<sup>fl/fl</sup>*

1029 and Mtor-cKOAdv mice with i.pl. injection with NPY (0.2 nmol), scrambled NPY (0.2  
1030 nmol), BIBO3304 (5 nmol) or BIIE0246 (50 nmol) at day 4, 6, and 8 after SNI (n = 6-  
1031 11 mice per group). BIBO3304, Y1R antagonist; BIIE0246, Y2R antagonist.

1032 Values are means  $\pm$  SEM. \*  $p < 0.05$ , \*\*  $p < 0.01$ , and \*\*\*  $p < 0.001$  vs. *Mtor-cKO<sup>Adv</sup>* with  
1033 NPY, two-way ANOVA followed by Bonferroni's *post hoc* tests among groups. BL,  
1034 baseline; i.pl., intraplantar; Veh, vehicle; PWT, paw withdraw threshold; PWL, paw  
1035 withdraw latency.

1036 **Figure 8-source data 1.** Raw data of mechanical allodynia and heat hyperalgesia.

1037

1038

**Table 1. Primer sequences in RT-PCR.**

| Gene name          | Forward               | Reverse              |
|--------------------|-----------------------|----------------------|
| <i>Nts</i>         | CCTGACTCTCCTGGCTTTCA  | CCGGGCTGTTCACGTTATTT |
| <i>Npy</i>         | GGACTGACCCTCGCTCTATC  | CTTCAAGCCTTGTTCTGGGG |
| <i>Annexin a10</i> | CATCCTAACACAACGCAGCA  | AGTTCCTGGTCCCTTCATGG |
| <i>Lipn</i>        | AAGTTCGGAAGTCCTCTGGG  | GAATCCACCAGCGCTTAAGG |
| <i>Gpr119</i>      | GTCACTATCAGCCATCCGGA  | GCTGGCCGACTTCTAGAGAT |
| <i>Fst</i>         | CGAATGTGCACTCCTCAAGG  | ACTGTTCAGAAGAGGAGGGC |
| <i>Gpr151</i>      | GTATGGCATGTGAAGGCTGG  | GCCTCCTGAACCTCTGAAGT |
| <i>Fgf3</i>        | ACCTGGCCATGAACAAGAGA  | ACACGTACCAAGGTCTCTGG |
| <i>Csf1</i>        | TGCTAAGTGCTCTAGCCGAG  | CCCCAACAGTCAGCAAGAC  |
| <i>Actin</i>       | GTGACGTTGACATCCGTAAGA | GCCGGACTCATCGTACTCC  |

1039



1040 **Supplementary material**

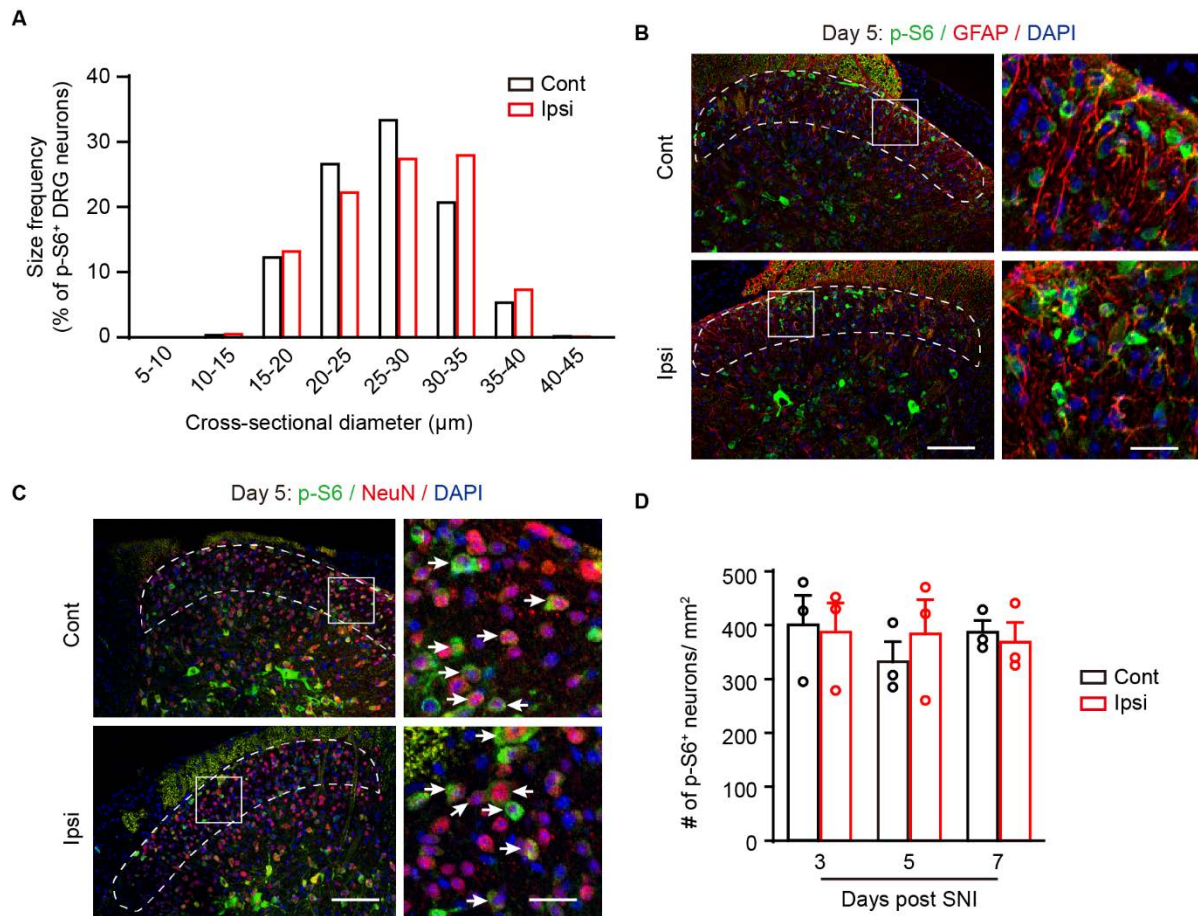

1041

1042 **Figure 1-figure supplement 1. Characterizing of p-S6 staining with different**  
1043 **markers in DRG or SDH after SNI.**

1044 (A) Size frequency distribution patterns of p-S6 positive neurons from contralateral and  
1045 ipsilateral DRG at day 3 post SNI (n=579 and 718 neurons from 3-4 mice respectively).

1046 (B) Representative images of p-S6 and GFAP in superficial SDH (dotted regions) at  
1047 day 5 after SNI. Boxes show the region with magnification.

1048 (C) Representative images of p-S6 and NeuN immunolabeling (arrows) in superficial  
1049 SDH (dotted regions) at day 5 after SNI. Boxes show the region with magnification.

1050 Scale bars, 100  $\mu\text{m}$  and 20  $\mu\text{m}$  for lower- and higher-magnification images, respectively.

1051 (D) Quantitation of p-S6+ neurons in superficial SDH at day 3 to 7 after SNI (n=3 mice  
1052 per time point). Values are means  $\pm$  SEM. Two-way ANOVA followed by Bonferroni's

1053 *post hoc* tests among groups. Scale bars, 100  $\mu\text{m}$  and 20  $\mu\text{m}$  for lower- and higher-  
1054 magnification images, respectively. Ipsi, ipsilateral; Cont, contralateral.

1055 **Figure 1-figure supplement 1-source data 1.** Source data used to generate Figure A  
1056 and D.

1057

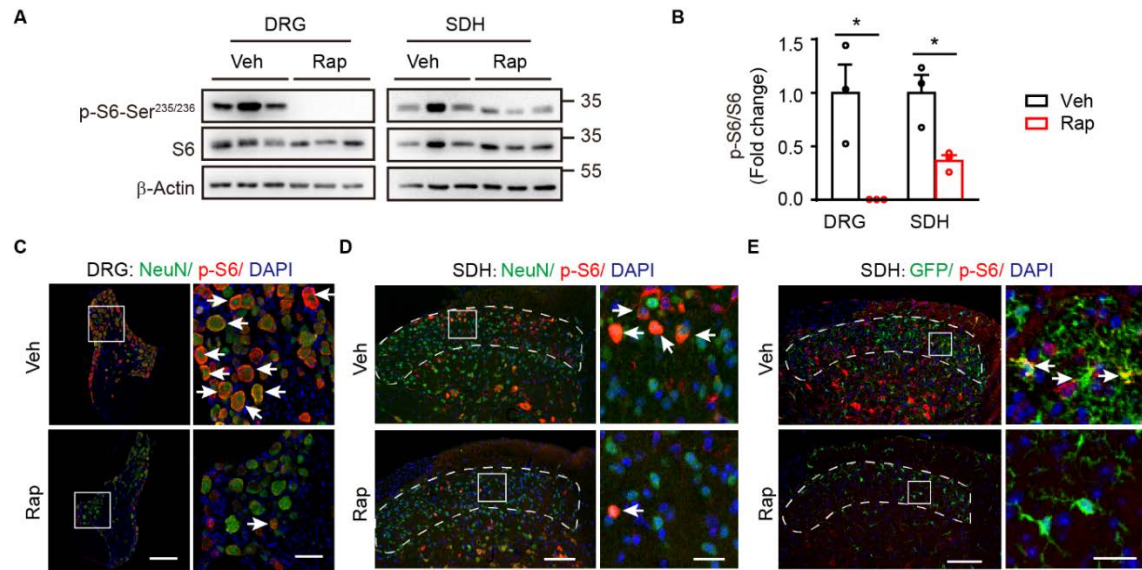

1058

1059 **Figure 2-figure supplement 1. Administration of rapamycin suppresses mTOR**  
1060 **activation.**

1061 (A) Representative blots indicating the decreased p-S6 levels in the ipsilateral DRG and  
1062 SDH following 7-day continuous intraperitoneal (i.p.) injection of rapamycin or vehicle  
1063 in *Mtor<sup>fl/fl</sup>* mice.

1064 (B) Quantitation of p-S6/S6 in DRG and SDH following rapamycin treatments (n=3  
1065 mice per group).

1066 (C-E) Co-immunostaining of p-S6 with NeuN or GFP in ipsilateral DRG (C) and SDH  
1067 (D, E) after i.p. administration of vehicle or rapamycin (arrows indicating p-S6<sup>+</sup> cells)  
1068 at day 7 after SNI. Boxes show regions with magnification. Scale bars, 100 μm and 20  
1069 μm in (C), and 200 μm and 50 μm in (D, E) for lower- and higher-magnification images,  
1070 respectively.

1071 Values are means ± SEM. \* *p*<0.05 and \*\* *p*<0.01 versus Veh, unpaired student t-tests  
1072 (B). Rap, rapamycin; Veh, vehicle; BL, baseline; SDH, spinal dorsal horn.

1073 **Figure 2-figure supplement 1-source data 1.** Source data used to generate Figure B.

1074 **Figure 2-figure supplement 1-source data 2.** Original pictures of the western blots  
1075 presented in Figure A.

1076

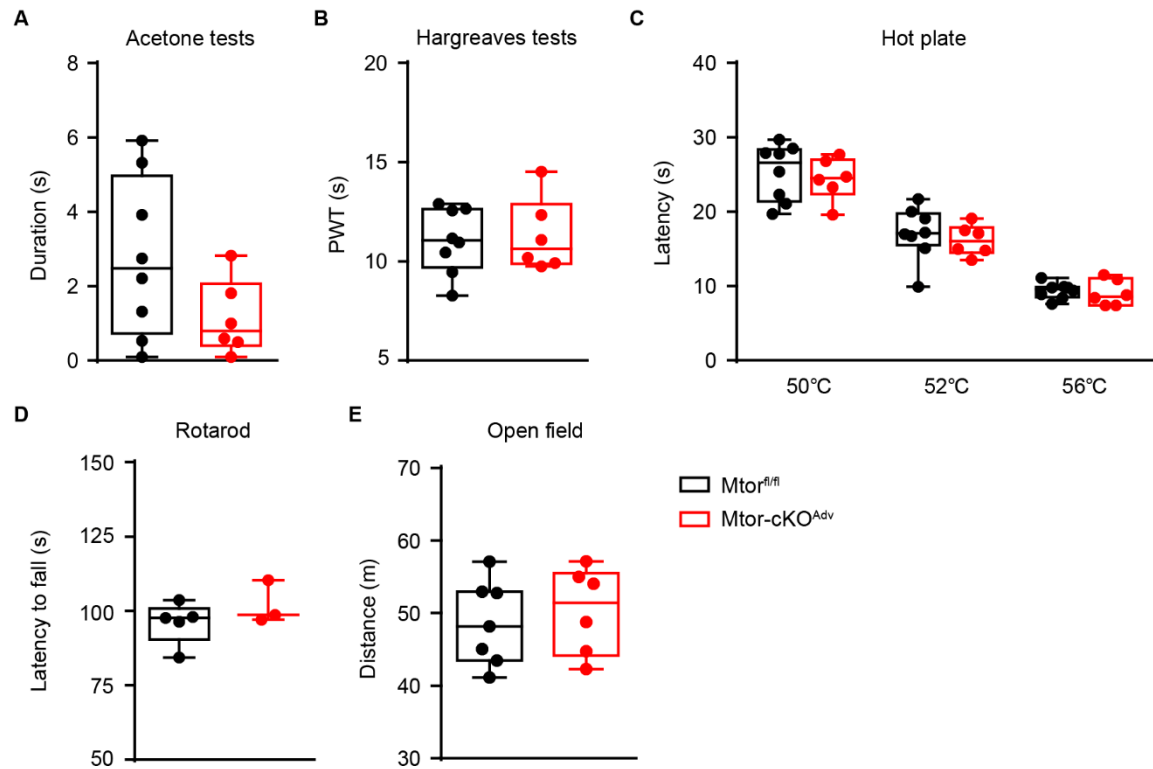

1077

1078 **Figure 3-figure supplement 1. Sensory functions and motor activities are**  
1079 **comparable in  $Mtor^{fl/fl}$  and  $Mtor-cKO^{Adv}$  mice at basal state.**

1080 (A) Acetone tests (n=6-8 mice per group).

1081 (B) Hargreaves tests (n=6-8 mice per group).

1082 (C) Hot plate tests (n=6-8 mice per group).

1083 (D) Rotarod tests (n=3-5 mice per group).

1084 (E) Open field tests in  $Mtor^{fl/fl}$  and  $Mtor-cKO^{Adv}$  mice (n=6-7 mice per group).

1085 Values are means  $\pm$  SEM. Unpaired student t-tests (A, B, D, E) and two-way ANOVA  
1086 followed by Bonferroni's *post hoc* tests among groups (C).

1087 **Figure 3-figure supplement 1-source data 1. Source data used to generate Figure A-**

1088 E.

1089

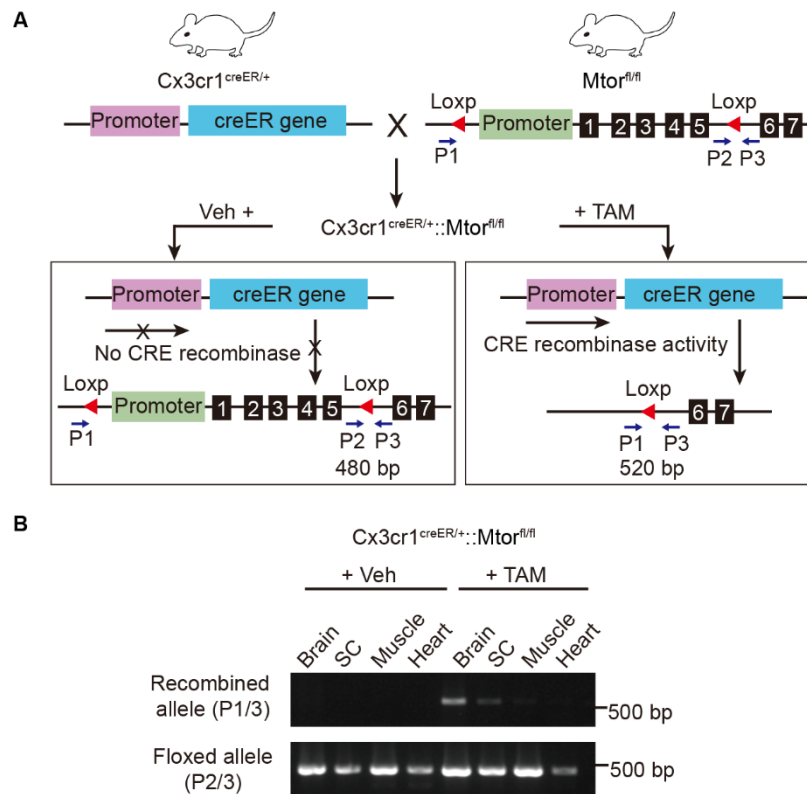

**Figure 4-figure supplement 1. Stratagem for generating *Mtor-cKO<sup>MG</sup>* mice.**

(A) Schematic showing the generation of *Mtor-cKO<sup>MG</sup>* mice. Exons 1-5 of the *Mtor* gene is flanked by *loxP* sites and excised in microglia expressing Cx3cr1-Cre recombinase after TAM administration. The position of P1, P2 and P3 primers and the size of the DNA segments amplified by primer pairs are illustrated.

(B) Agarose gel electrophoresis of P1, P2 and P3 PCR products showing that Cre-mediated recombination is specifically occurred in the central nervous system (brain and spinal cord), but not in other peripheral tissues (muscle or heart). TAM, tamoxifen; Veh, vehicle.

**Figure 4-figure supplement 1-source data 1.** Original pictures of the blots presented in Figure B.

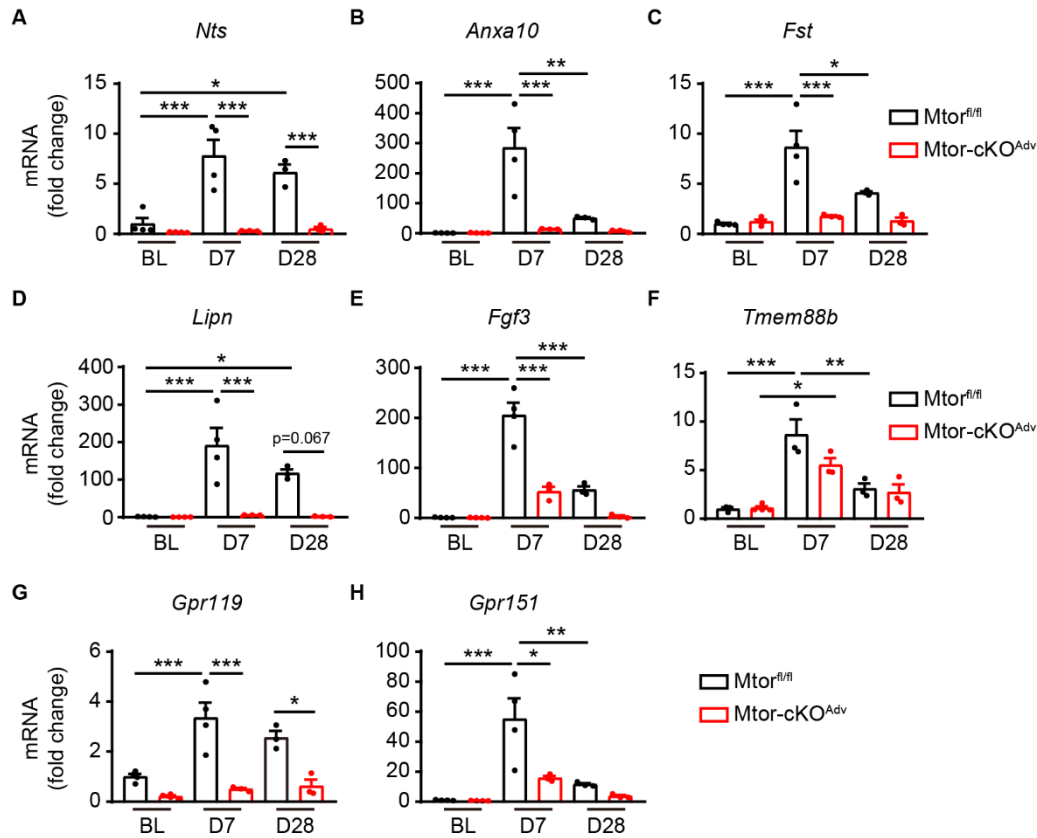

1104

1105 **Figure 5-figure supplement 1. Quantitative RT-PCR of downregulated DEGs**  
 1106 **identified in RNA sequencing.**

1107 (A) *Nts*, *Neurotensin*; (B) *Anxa10*, *Annexin A10*; (C) *Fst*, *Follistatin*; (D) *Lipn*, *Lipase*  
 1108 *family member N*; (E) *Fgf3*, *Fibroblast growth factor 3*; (F) *Tmem88b*, *Transmembrane*  
 1109 *protein 88b*; (G) *Gpr119*, *G protein-coupled receptor 119*; (H) *Gpr151*. n=3-4 mice  
 1110 per time point per group.

1111 \* p < 0.05, \*\* p < 0.01, \*\*\* p < 0.001, one-way ANOVA followed by Bonferroni's *post*  
 1112 *hoc* tests among groups. BL, baseline; D, day; DEGs, differentially expressed genes.

1113 **Figure 5-figure supplement 1-source data 1.** Source data used to generate Figure A-  
 1114 H.

1115

1116

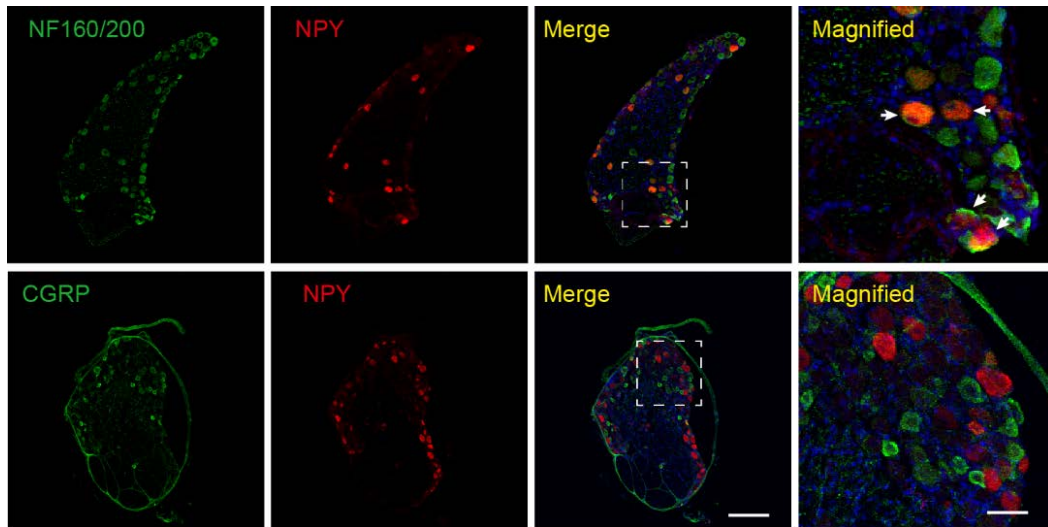

1117

1118 **Figure 6-figure supplement 1. NPY was expressed in large-sized**  
1119 **mechanoreceptors.**

1120 Representative images of NPY and NF160/200 or CGRP staining in the injured DRG.  
1121 Arrows indicating both NPY<sup>+</sup> and NF160/200<sup>+</sup> neurons. Boxes show regions with  
1122 magnification. Scale bars, 200  $\mu$ m and 50  $\mu$ m for lower- and higher-magnification  
1123 images, respectively.

1124

1125

1126

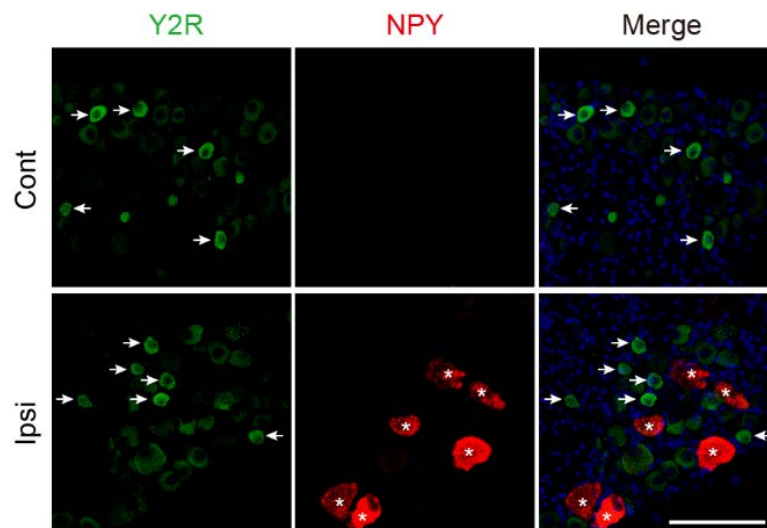

1127

1128 **Figure 7-figure supplement 1. Distinct expression pattern of NPY (\*) and Y2R**  
1129 **(arrows) by immunofluorescence analysis. Scale bar, 100  $\mu$ m.**
